# Supplementary material
Source: PubMed Central journal article supplement (PMC3427123)
Supplement: 1207833109_sapp.pdf [file 1207833109_sapp.pdf]

## Supporting information

### SI Materials and Methods

**BAC clone sequencing and assembly.** Each individual BAC clone in the minimum tilling path physical maps for HSY and counterpart X chromosome was fully sequenced using Sanger method. Briefly, BAC DNAs were isolated from single colony culture and randomly sheared to approximately 3 kb fragments. The sheared fragments were end-repaired, size-selected on an agarose gel, purified, and ligated to the pSMART vector (Lucigen, WI 53562 USA). The plasmid DNA of randomly picked electro-transformed clones with 8 to 20 fold coverage of the BAC insert fragment was isolated and sequenced using ABI BigDye Terminator version 3.1 on a 3730XL DNA analyzer (Applied Biosystems, <http://www.appliedbiosystems.com/>).

The Sanger reads were filtered and screened to remove *E.coli* genomic sequences, vector sequences, and low quality or ambiguous sequences. The trimmed reads were sequentially assembled into contigs using Phred/Phrap/Consed (1, 2), CAP3 (3) packages, and Sequencher software (Gene Codes Corporation, Ann Arbor, MI). Individual BAC assemblies were examined manually for sequence regions with signs of miss-assemble and also checked by long range PCR targeting 10kb amplicons. Suspected low quality regions and gaps in the assembly were resolved by removing ambiguous reads, and/or by primer walking, re-sequencing the PCR products, sequencing additional shotgun sub-clones, and/or alignment with neighboring BAC sequences. A BAC was not considered complete until all inconsistent read pairs had been resolved and Consed reported an error rate of less than 1 per 10,000 bases. The GenBank accession numbers for all the sequenced BACs are listed in (Table S14). Based on the physical maps of the HSY and its corresponding X region, the individual BAC sequences were joined into pseudomolecules.

**Identification of X and HSY shared collinear blocks.** We used Mauve, a genome alignment program, to identify co-linear blocks between the HSY and X progressively from a local co-linear block score (LCBS) of 1K up to 171K. Using a lower LCBS, numerous blocks with rearrangements were detected. By increasing the LCBS, the number of co-linear blocks was decreased and only larger blocks were shown in Fig. S6, and the blocks having lower LCBS were show as solid yellow. The first large Block (Block I) was detected using LCBS 12522. The second large Block was detected using LCBS 78927.

**Repeat and CpG islands analysis.** Known repeats were identified in the HSY and X pseudomolecule sequences using RepeatMasker (<http://www.repeatmasker.org>) with a custom repeat library generated by combining Repbase (4), TIGR plant repeats ([ftp://ftp.tigr.org/pub/data/TIGR\\_Plant\\_Repeats](ftp://ftp.tigr.org/pub/data/TIGR_Plant_Repeats)), and known papaya repeats (5). To identify sex-specific repeats, RepeatScout-v1 (6) was applied to find repeats in both HSY and X sequences. Non-redundant repeats longer than 100bp were compared with known papaya repeats (5) using CD-HIT software (7) with a cut-off of 70% similarity to identify new repeats. The criteria for new repeats were: 1) at least 50% of the consensus sequence length aligned, 2) occurrence at least 10 times in the HSY or X sequences, 3) greater than 75% identity in the alignment with the HSY/X sequence, 4) sex-specific repeats were defined as those with fewer than 10 hits in the complete papaya genome sequence. The tandem repeats were analysed using the Tandem Repeats Finder software (8).

CpG islands were identified in repeat-masked sequences using the Emboss toolbox “newcpgreport” software with the parameters set as follows: window size: 100 bp, minimum GC content: >50%, minimum Obs/Exp ratio: >0.6, and minimum CpG island length: 200. The schematics were drawn using DomainDraw (9).

**Annotation of transcription units.** The repeat-masked HSY and X sequences were blasted to the papaya EST and gene model databases and also blasted to EST datasets of *Medicago truncatula*, *Oryza*

*sativa*, *Populus trichocarpa*, *Vitis vinifera*, and *Arabidopsis thaliana*, using tblastx for transcription unit identification. The loci where EST or gene models specifically aligned to HSY sequences with greater than 94% sequence identity were considered HSY-specific transcription units, loci where EST or gene models specifically aligned to X sequences with greater than 98% sequence identity were considered X-specific transcription units, and sequences with greater than 98% identity with X sequences and greater than 94% with HSY sequences were classified as XYtranscription unit pairs. Each predicted transcript was translated in all six reading frames to distinguish protein-coding genes from pseudogenes. Potential functions of protein-coding transcripts were predicted using conserved domains and gene functions of homologs in other plants. Two *de novo* gene prediction programs, Genscan, and Fgenesh, were also used to predict additional genes that may have been missed using the above approaches. Additional genes predicted by all three programs were considered possible genes.

The computationally annotated transcripts were tested by RT-PCR. cDNAs from different developmental stages of flower and leaf were amplified with specific primers designed across (at least one) intron whenever possible. The amplicons were sequenced from at least one tissue of all three sexes were sequenced. The sequences obtained were blasted against the HSY and X pseudomolecules to validate the target amplification and to determine the chromosomal origin of each sequence. Most genes were tested with multiple primer pairs (to test the gene structures predicted by the different prediction program) and the final gene structure was annotated based on the RT product sequences. Most of the genes present in the X chromosome were already annotated in papaya gene models using programs trained for papaya specific transcripts. Transcription units predicted from the papaya gene modal or the papaya EST database were considered to be validated if the expected sized product was obtained from specific primers. RNAseq data obtained from shoot apical meristem cDNA was used to further validate these transcription units.

### **Additional notes**

**G+C content of the HSY and X.** The G+C contents of the HSY, its X counterpart, and of the entire papaya genome were similar in the unmasked sequences (36.2%, 35.7%, and 35.3%), or the masked ones (35.7%, 34.2% and 33.5%) (Table S15, Fig. S3). CpG islands in repeat-masked sequences are predominantly associated with expressed genes. The density of CpG islands in the HSY and, to a lesser extent, the X counterpart is lower than in the rest of the genome (Table S15 and Fig. S11), probably due to accumulation of repetitive sequences in the regions (Fig. S12).

**Identification of Border B.** The HSY border B was identified on both the HSY and X physical maps. BACs SH85C03 and SH86B15, which are common to both chromosomes, are immediately adjacent to the genetically defined border (Fig. S2A; 10). In BAC SH85C03, a 90 kb sequence overlaps and is identical with X BAC SH30B21, showing that SH85C03 (and also SH86B15) must represent X chromosome sequence; consistent with this, there is a region of 134 kb of overlapping sequence between BAC SH85C03 and the HSY BAC SH58C24, but the sequences differ by 2.1%. Genome-wide BAC end sequence searches revealed a strong candidate for the HSY region corresponding to two of these X BACs, SH85C03 and SH86B15. A BAC clone, SH60M19, with insert size 252 kb, includes an identical overlap of 20.5 kb with HSY BAC 58C24 (Fig. S2A). This BAC could be aligned with part of the X BAC SH85C03 and the entire X BAC SH86B15, and it extends 7,110 bp beyond the X BAC SH86B15. Comparison of these two BACs yielded 7 matched pieces, with one uninterrupted piece of 130 kb at the end of SH86B15 furthest from the genetically defined border B. Across the 182 kb region of the X BAC SH86B15 that aligns with HSY sequence, the numbers of single nucleotide polymorphisms (SNPs) and indels decline over the first 80 kb from the border, and the remaining 102 kb included only 6 SNPs and 6 single base indels, close to the sequencing error of 1 per  $10^5$  nucleotides (Fig. S2B). The HSY border B sequence, where homology with the X region becomes high, lies about 277 kb beyond the genetically defined border (Fig. S2A).

**Computing numbers of genes present in the ancestral chromosome, and estimating the numbers lost from the HSY and the X.** It is important to differentiate between (i) transcriptional units present as functional copies on the X and completely missing from the HSY (or vice versa) and (ii) those with a copy recognizable on the HSY, but clearly non-functional (and vice versa). To show our reasoning, consider the example of inferring losses from the HSY, both of these categories suggest that a gene was present in the ancestral chromosome, but the HSY copy was lost (Category i) or pseudogenized (Category ii). Category (i) includes 24 genes (excluding the 4 sequence pairs that are pseudogenes on both the X and the Y); none of these 24 appears to have been moved to the X from an autosomal origin, and so their absence from the HSY implies loss from the HSY. Category (ii) includes the 10 HSY pseudogenes with intact and putatively functional X copies.

Without an outgroup, we cannot, of course, definitively infer losses, or distinguish between losses from the HSY and gains of sequences by the X, or vice versa. However, it seems reasonable to classify the 24 genes in Category (i) genes as losses from the Y, rather than gains by the X, based on the following reasoning. If the genes had been duplicated onto the X (as has been inferred in other sex chromosome systems), we should see the original copy in the autosomal sequences, but we found no traces of these genes. Of course, this does not take into account possible gains of genes by the X where the autosomal source gene is no longer present; however, this seems unlikely in a young sex chromosome system such as papaya (age estimates are described in detail in the manuscript, see also COMMENT 2 below). We thus obtain a total of  $24+10=34$  genes present in the ancestral chromosome, but lost or pseudogenized in the HSY.

When considering possible losses from the X, a total of 16 HSY genes have no X counterparts, of which 7 may be duplicates of autosomal genes, and 9 may therefore represent losses from the X. The counterpart to Category (ii) includes the 6 X pseudogenes with intact and putatively functional HSY copies. Overall, these two categories give us two alternative total numbers of genes present in the ancestral chromosome, but lost or pseudogenized in the X: either  $6+16=22$ , or  $6+9=15$ .

## References

1. Ewing B, Hillier L, Wendl M, Green P (1998) Basecalling of automated sequencer traces using phred. I. Accuracy assessment. *Genome Res* 8:175-185.
2. Gordon D, Abajian C, Green P (1998) Consed: a graphical tool for sequence finishing. *Genome Res* 8:195-202.
3. Huang X, Madan A (1999) Cap3: A DNA sequence assembly program. *Genome Res* 9:868-877.
4. Jurka J, et al. (2005) Repbase update, a database of eukaryotic repetitive elements. *Cytogenet. Genome Res* 110:462-467.
5. Nagarajan N, et al. (2008) Genome-wide analysis of repetitive elements in papaya. *Trop Plant Biol* 1:191-201.
6. Price AL, Jones NC, Pevzner PA (2005) *De novo* identification of repeat families in large genomes. Paper presented at the proceedings of the 13 Annual International conference on Intelligent Systems for Molecular Biology (ISMB-05).
7. Li W, Godzik A (2006) Cd-hit: a fast program for clustering and comparing large sets of protein or nucleotide sequences. *Bioinformatics* 22:1658-1659.
8. Benson G (1999) Tandem repeats finder: a program to analyze DNA sequences. *Nucleic Acids Res* 27:573-580.
9. Fink JL, Hamilton N (2007) DomainDraw: a macromolecular schematic drawing program. *In Silico Biol* 7:14.
10. Na J-K, et al. (2012) Constriction of physical maps for the sex-specific regions of papaya sex chromosomes. *BMC Genomics* 13:176.
11. Zhang W, Wang X, Yu Q, Ming R, Jiang J (2008) DNA methylation and

heterochromatinization in the male-specific region of the primitive Y chromosome of papaya. *Genome Res* 18:1938-1943.

12. Ming R, et al. (2008) The draft genome of the transgenic tropical fruit tree papaya (*Carica papaya* Linnaeus). *Nature* 452:991-996.

## Supplemental Figures

A

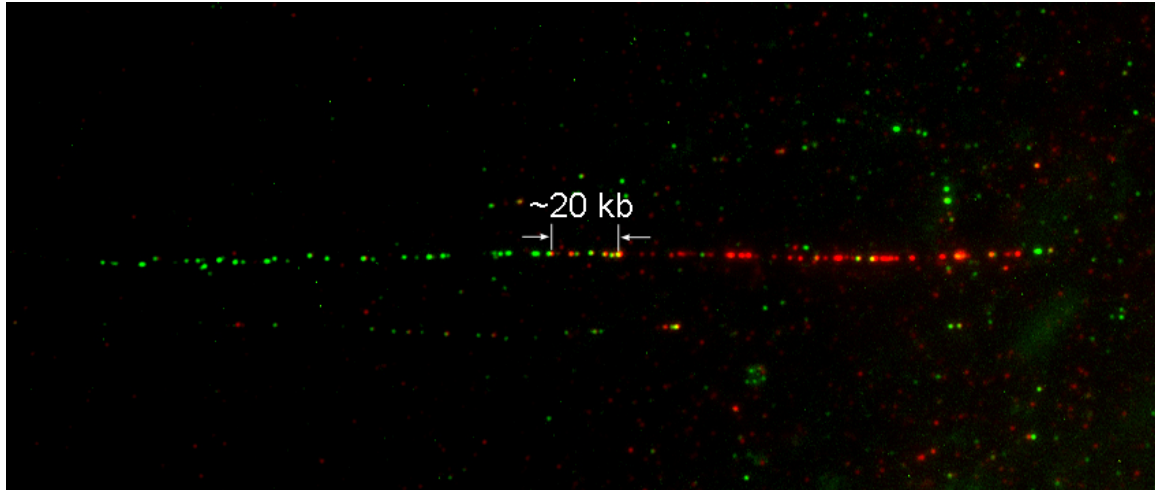

B

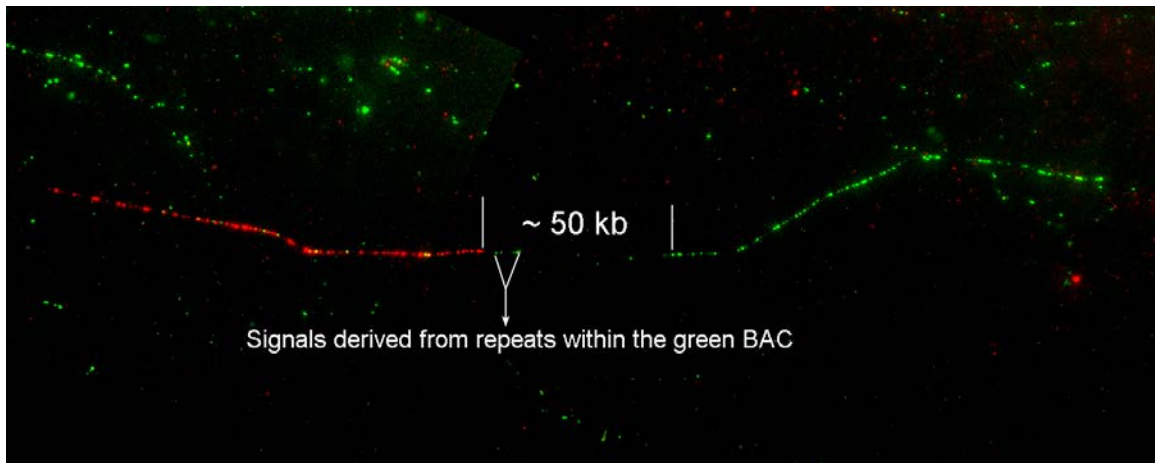

**Fig. S1.** Confirmation of overlapping BACs and estimation of gap sizes for physical mapping of the HSY and its X counterpart using fiber FISH. (A) Fiber-FISH image of two overlapping BAC clones in the HSY of papaya. HSY BAC clone 41F24 (130kb) was labeled as red and HSY BAC 57B23 (155kb) as green. These two BAC clones overlapped approximately 20 kb. (B) HSY BAC clone 76M08 (175kb) was labeled as red and HSY BAC 89I15 (180kb) as green, these two BACs are separated by approximately 50 kb. The short green signal within the gap (close to the red signal) may be derived from a repetitive DNA element that is on BAC 89I15.

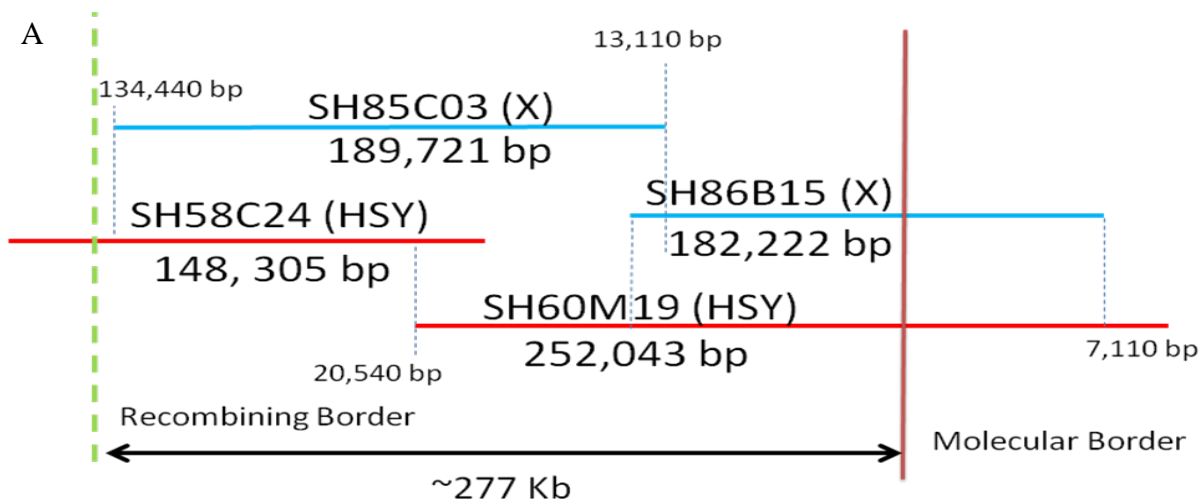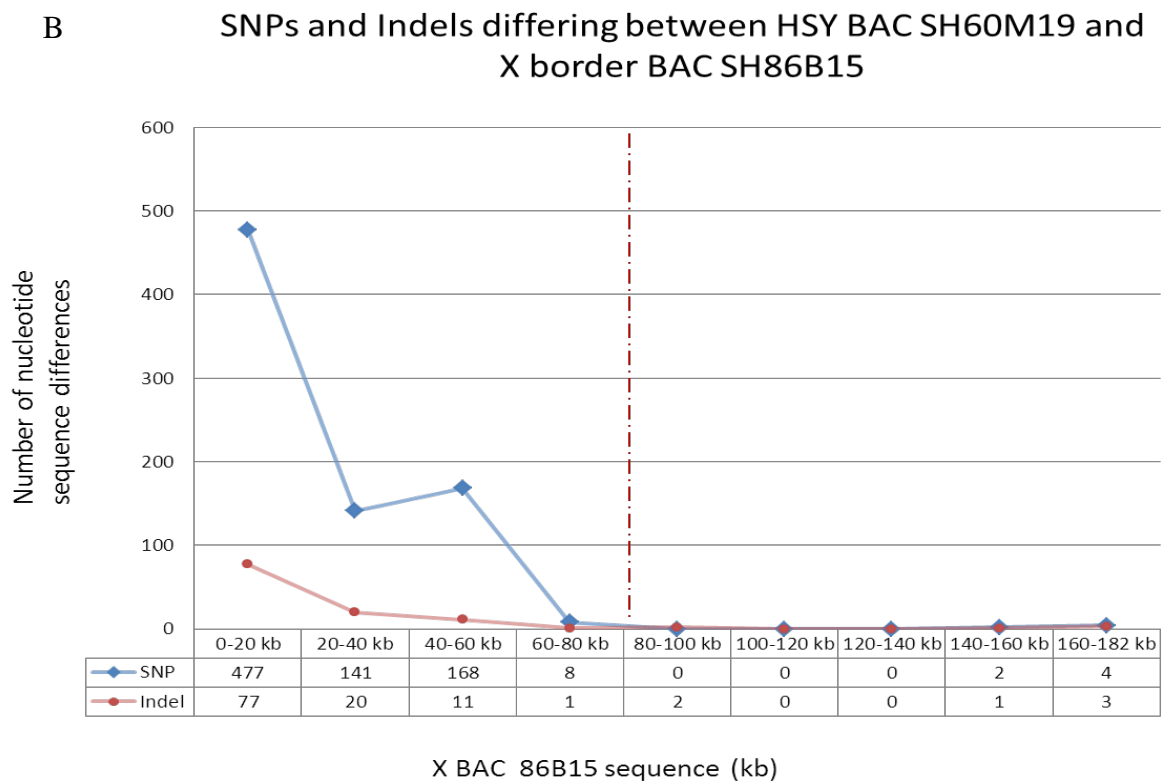

**Fig. S2.** Resolution of the X/HSY sequences in the Border B region. (A) The physical map of Border B. The dashed green line at the left represents the recombination border defined by fine mapping, and the solid maroon line at the right is the border defined by the number of sequence differences (see part B of the figure). The X sequences are in blue and the HSY sequences in red. (B) Molecularly defined border B. Numbers of sequence differences (SNPs and indels) between HSY BAC SH60M19 and X border BAC SH86B15. The dashed maroon line represents the molecularly defined border. The data points show number of SNPs and indels per 20 kb using X BAC 86B15 sequence as a reference for the X-axis.



X

Scale (1M)

a Coding genes

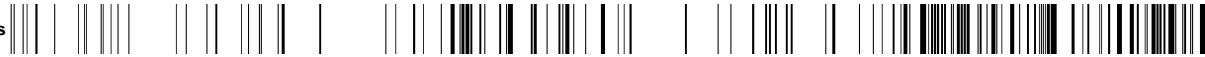

b CpG islands

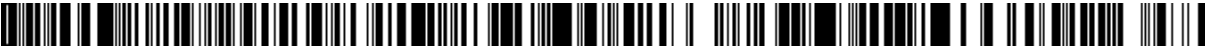

c G+C content

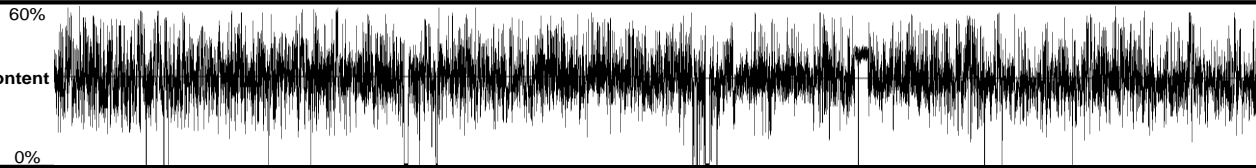

d + Repeat Organization

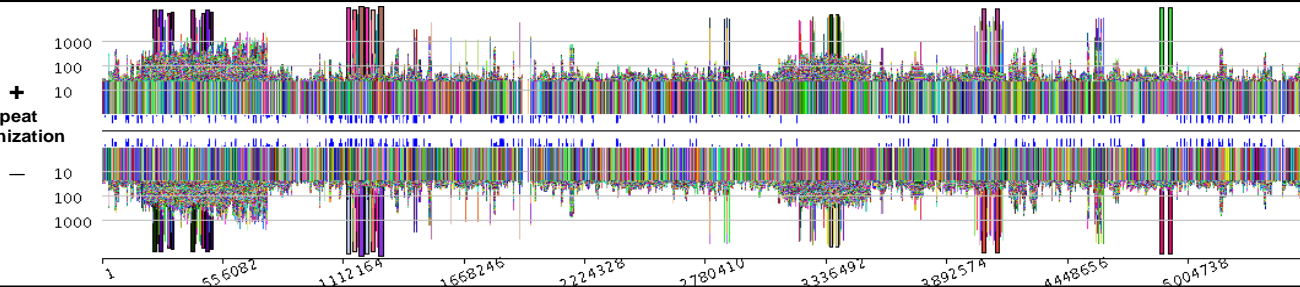

e BACs

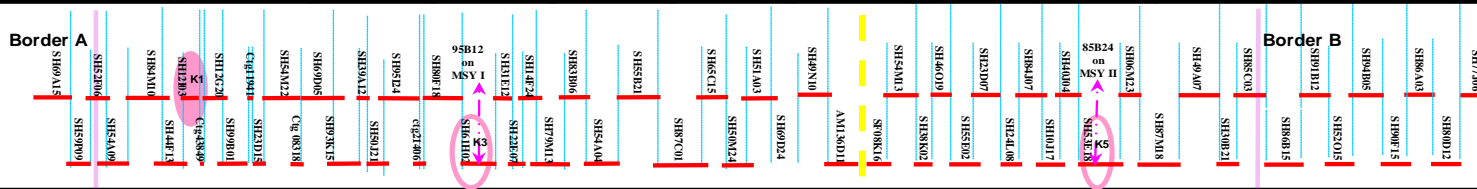

BAC physical map legends:

- BAC clone
- Border
- Overlap of BAC clones
- ↕ Line end points MSY and X corresponding region
- Gap between BAC contigs
- Knob position
- Corresponding position to knobs at MSY



**Fig. S3.** Annotated sequences of the HSY and X on sex chromosome in papaya. Chart of the HSY and X chromosome sequences showing protein-coding genes, CpG islands, G+C content, organization of repeated structures, and sequenced clones. All sequence features and BACs are drawn to scale. (A) The positions of all predicted protein-coding genes are shown in black. (B) CpG islands of the papaya sex chromosome are shown in black. CpG islands, predicted by EMBOSS CpGPlot are shown in black. (C) G+C content is plotted by the ARTEMIS sequence viewer and annotation tool. (D) The organization of repeated structures in the HSY and X counterpart region were *de novo* detected and generated by the Pygram pipeline. Extensive repeats were present on the HSY and X, with the blocks containing the most frequent repeats, are indicated by the small blue boxes proportional in size to the frequency located between the middle black line and the plus(+) and minus (-)strand views at each occurrence of the repeat. The x-axis corresponds to the sequence strand coordinate position (bp). The y-axis, corresponding to repeat size and scale, is logarithmic. Each repeat has its own specific color. All occurrences of the same repeat have the same color on both strands. (E) BACs from the finished sequence of the papaya HSY and X chromosome. One physical gap at HSY border A and one gap on X in the clone map are indicated.

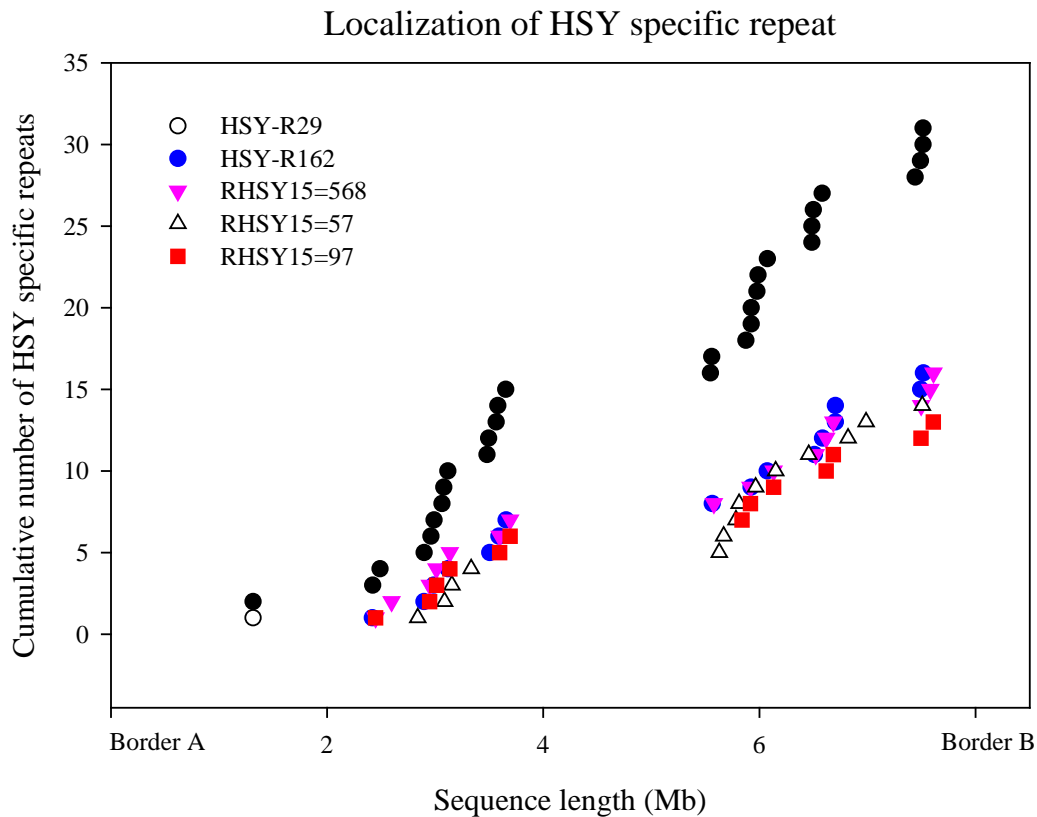

**Fig. S4.** Distribution of HSY-specific repeats across the HSY pseudomolecule. Each symbol denotes a different HSY-specific repeat (see symbol key).

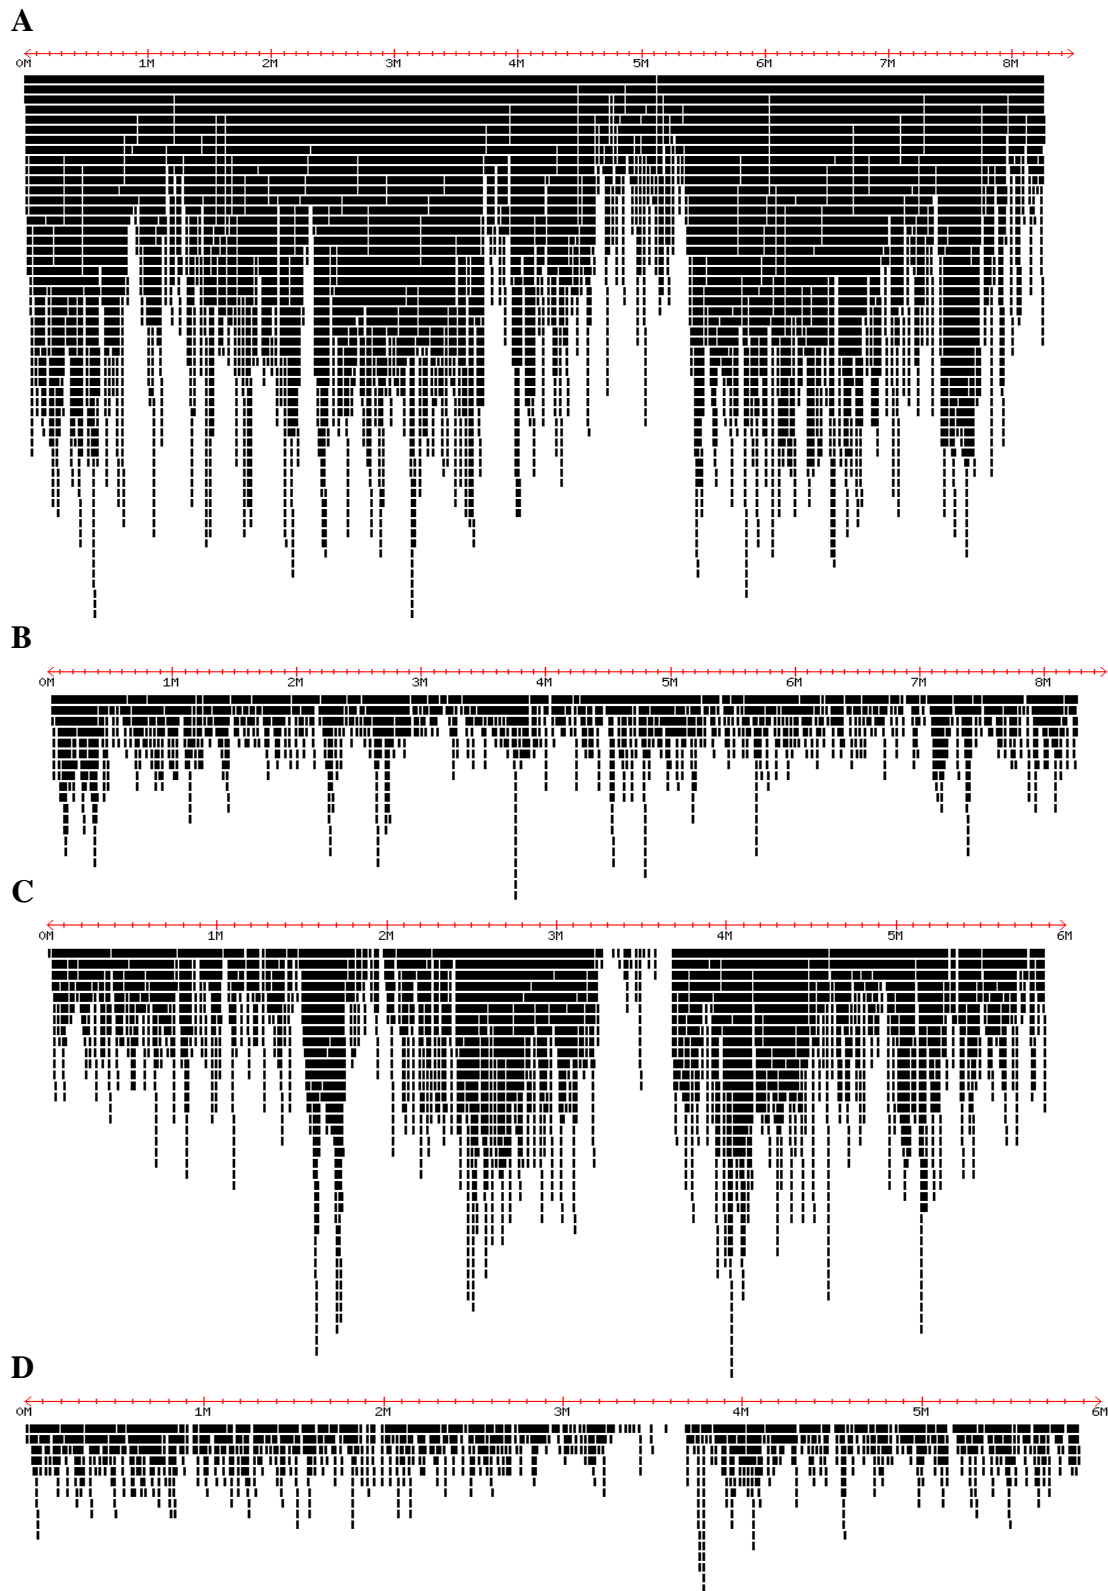

**Fig. S5.** Distribution of transposable elements and tandem repeats on the HSY and X concatenated pseudomolecules. (A) Transposable elements on HSY, (B) Tandem repeats on the HSY, (C) Transposable elements on the X, and (D) tandem repeats on X.

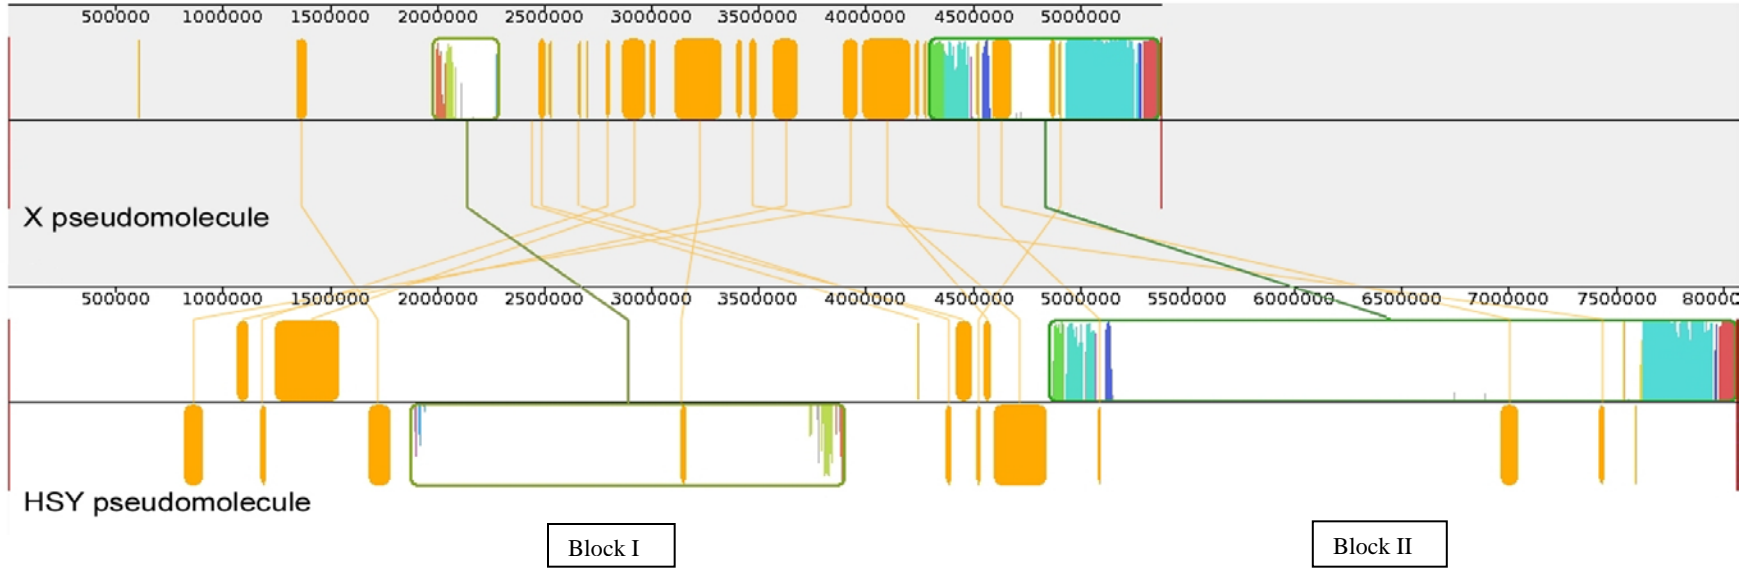

**Fig. S6.** Expansion of the HSY in comparison with the X counterpart. Mauve, a genome alignment program, performed a series of co-linear block identification comparisons progressively using local co-linear block scores (LCBS) of 1K up to 171K. The homologous segments are shown as colored bars. Block 1 was detected using a LCBS of 12522 and Block 2 was detected using an LCBS of 78927. The average sequence identity in the alignment is proportional to the height of the colored region. The orange blocks are homologous regions between the X and HSY with lower LCB scores. The local collinear blocks are connected across the aligned X and HSY sequences. Blocks shifted downward represent segments that are inverted relative to the reference sequences.

**A**

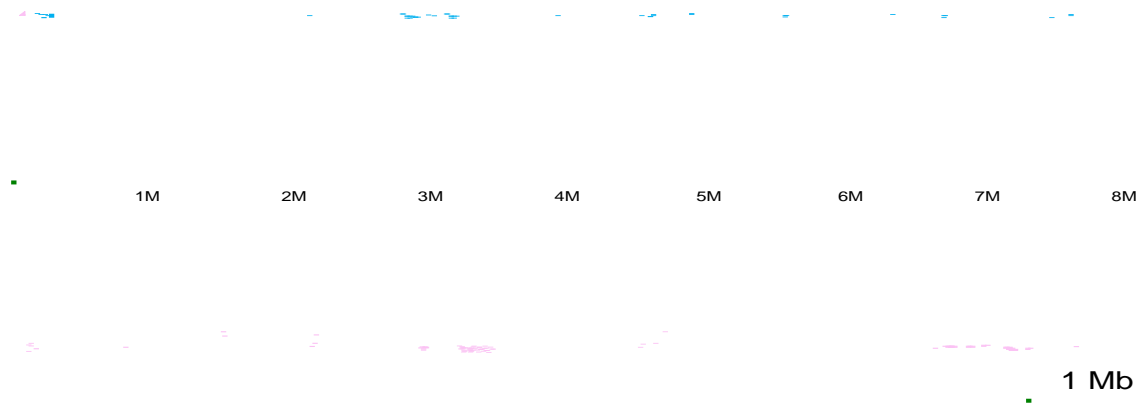

**B**

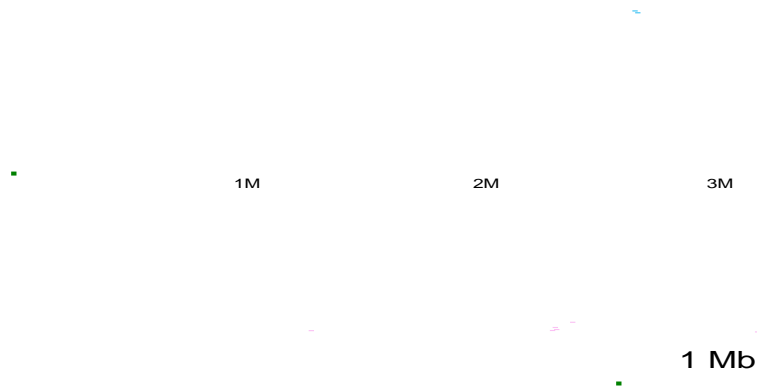

**Fig. S7.** The intra-chromosomal duplicates in HSY (A) and X (B) concatenated pseudomolecules. Green bar indicates the chromosome. Above the chromosome are direct duplications in pink bridge lines. Below the chromosome are the inverted duplications in blue bridge lines.

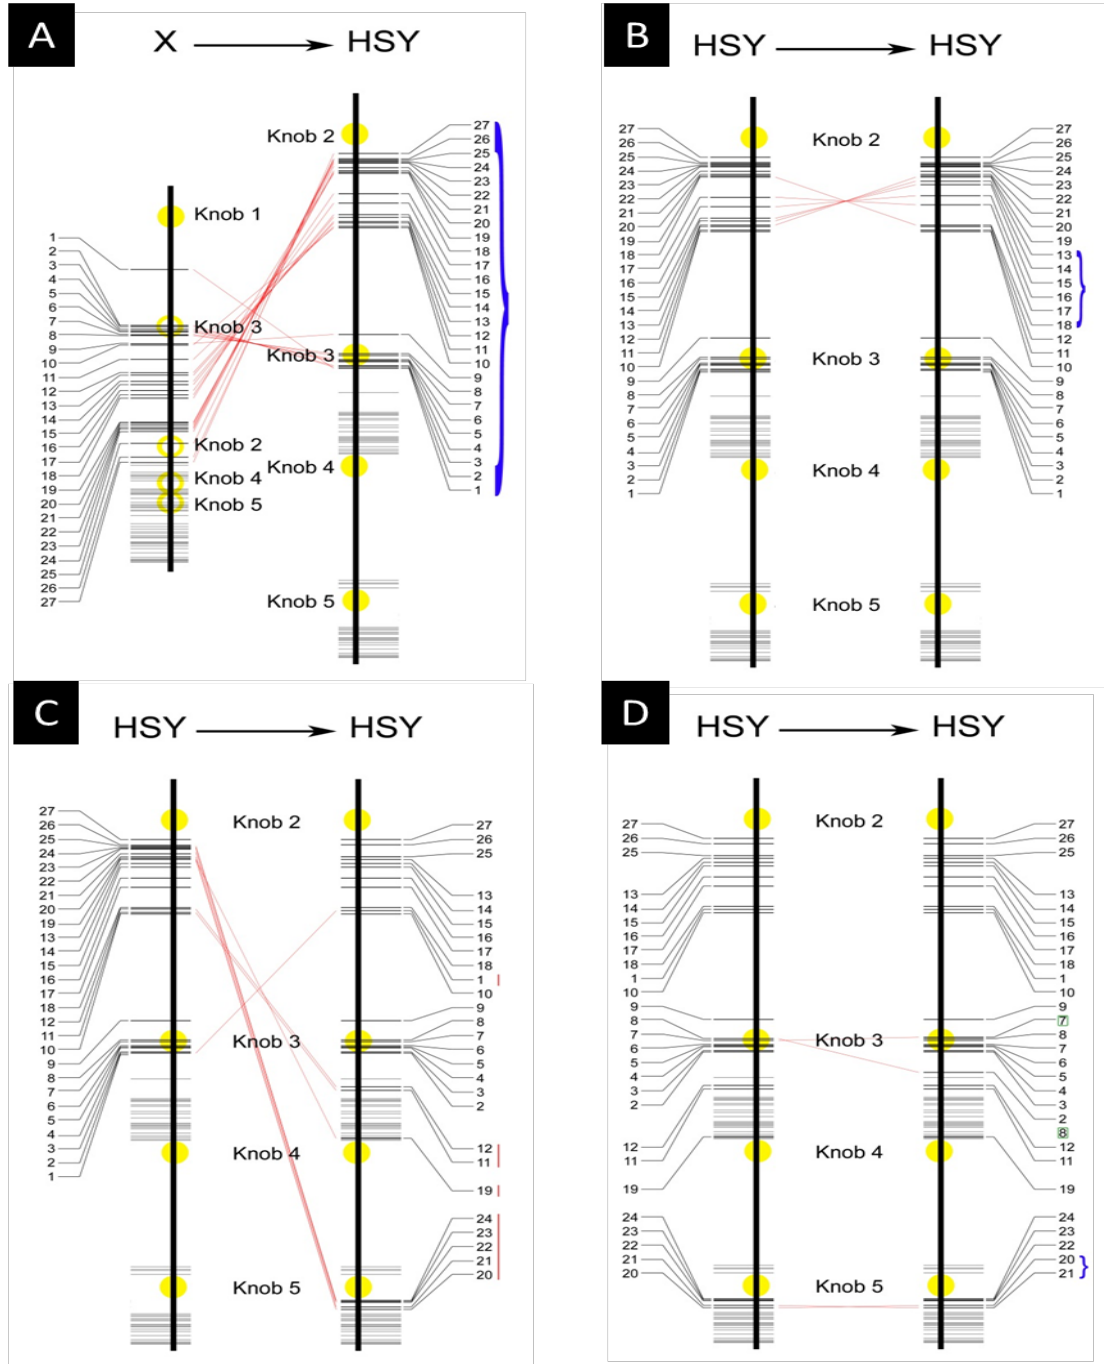

**Fig. S8.** Proposed steps of chromosomal evolution in inversion 1 between HSY and X based on the 70 homologous transcript-encoding sequence. The vertical black lines indicate the HSY and X sequences; the horizontal lines indicate the 70 homologous sequences, numbered according to their order on the X. The solid yellow circles indicate the heterochromatic knobs (11). Knob 1 is shared between the HSY and X. Knobs 2 - 5 are HSY-specific. The empty yellow circles indicate the estimated positions of knobs in the X chromosome corresponding to each of the numbered HSY knobs. (A) Inversion 1 – Genes 1-27 are inverted on the HSY (B) Inversion 1 – Genes 13-18 are inverted on the HSY (C) Inversion 1 – Genes 1, 12-11, 19, and 24-20 are translocated on the HSY (D) Inversion 1 – Genes 7 and 8 are duplicated on the HSY, Genes 20-21 are inverted on the HSY.

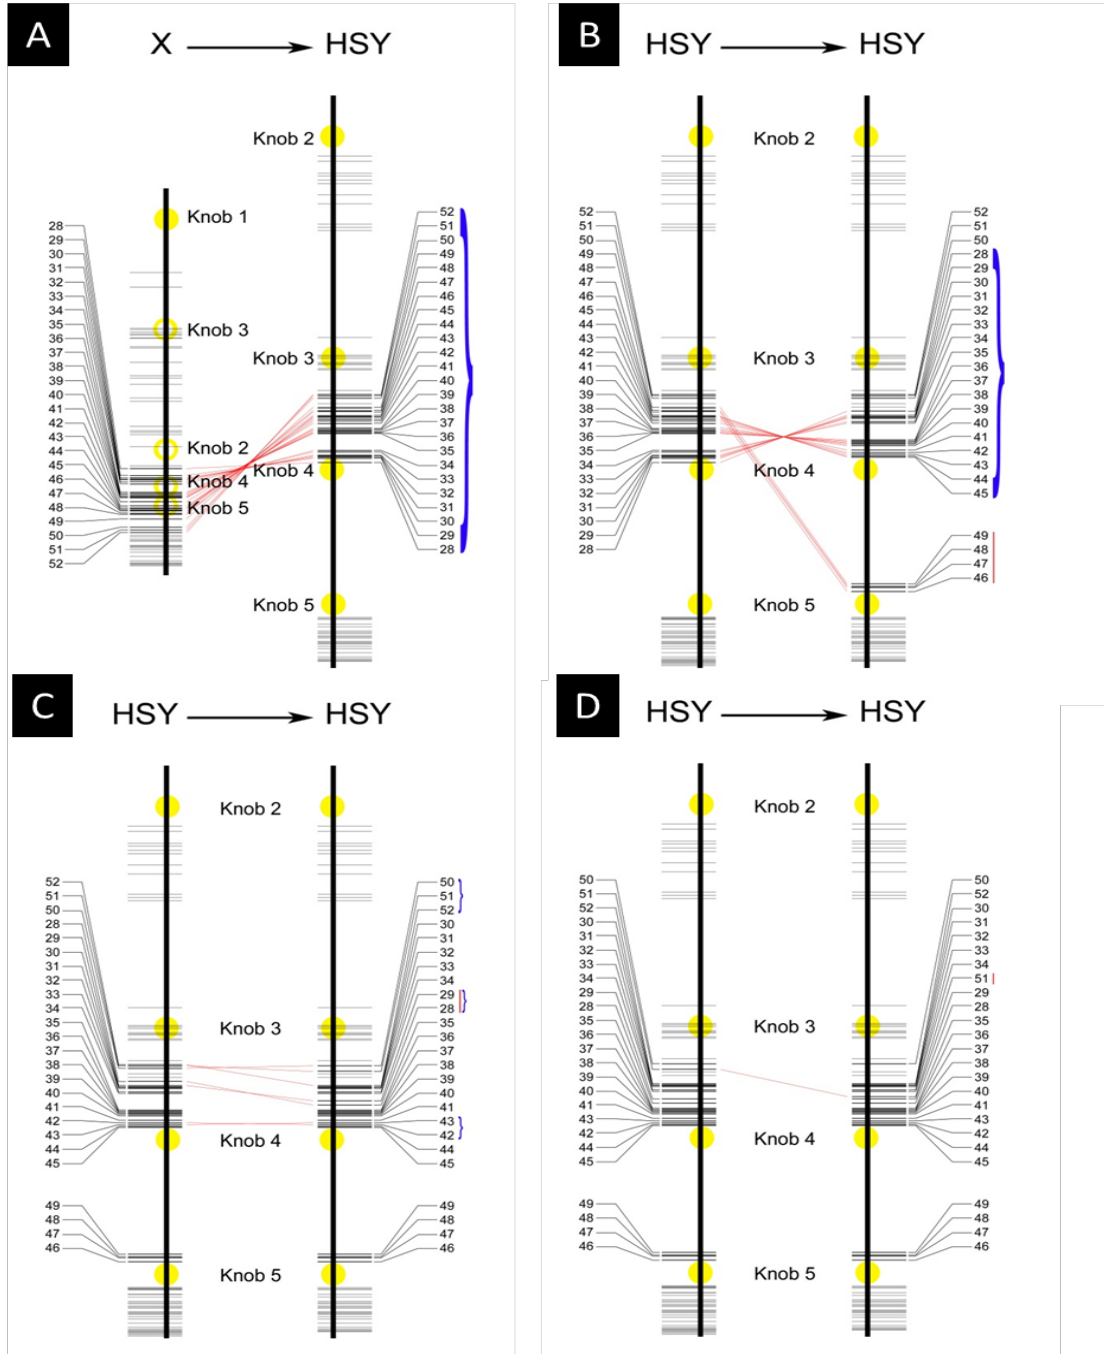

**Fig. S9.** Proposed steps of chromosomal evolution in inversion 2 between HSY and X based on the 70 homologous transcripts. The vertical black lines indicate the HSY and X sequences; the horizontal lines indicate the 70 homolog transcripts. The 70 homolog transcripts on X are numerically ordered. The solid yellow circles indicate the heterochromatic knobs (11). Knob 1 is shared between HSY and X. Knobs 2 - 5 are HSY specific. The empty yellow circles indicate the estimated corresponding positions of knobs in the X chromosome. (A) Inversion 2 – Genes 28-52 are inverted on the HSY (B) Inversion 2 – Genes 28-45 are inverted on the HSY and genes 49-46 are translocated on the HSY (C) Inversion 2 – Genes 50-52 and 43-42 are inverted on the HSY. Genes 29-28 are inverted and translocated on the HSY (D) Inversion 2 – Gene 51 is translocated on the HSY.

A.

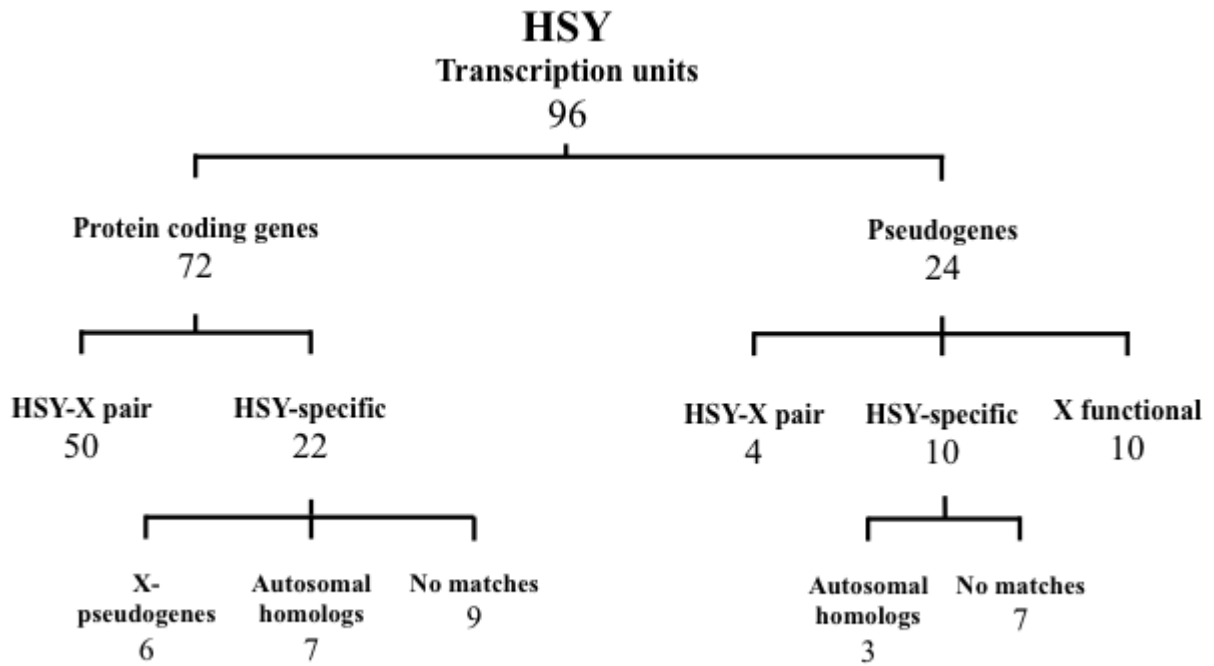

B.

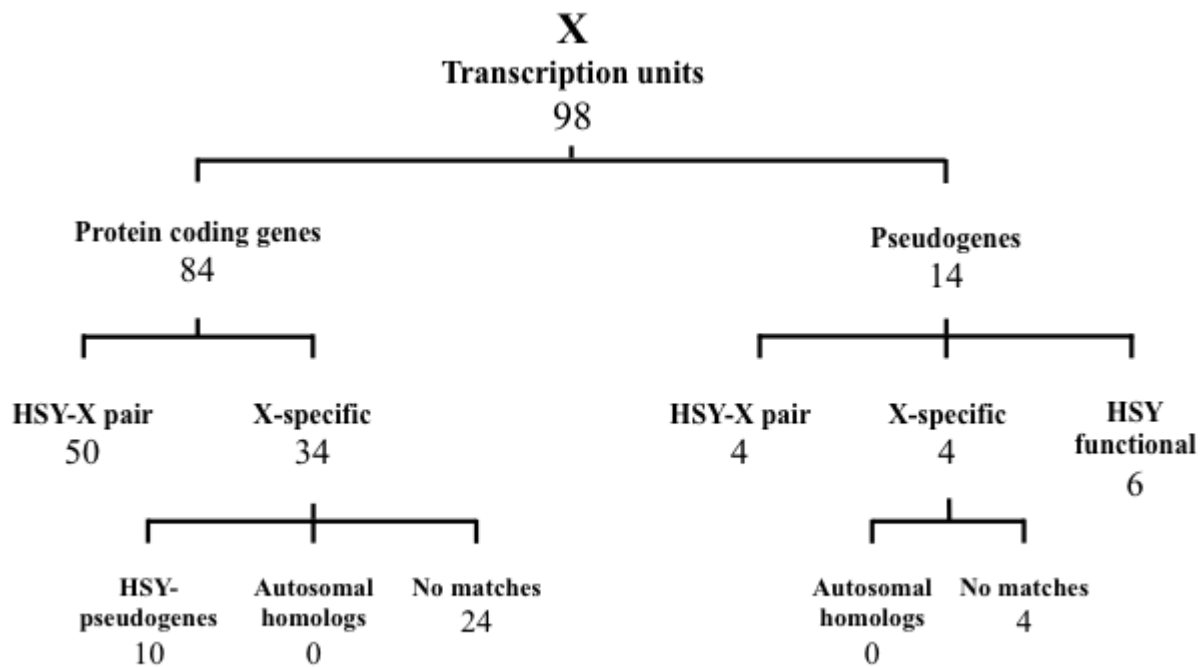

**Fig. S10.** Distribution of transcript-encoding sequences in the HSY and X. (A) The distribution of transcription units on the HSY. The transcription unit total for the HSY includes the protein

coding genes, pseudogenes, and the missing genes (X-specific genes or pseudogenes not found on the HSY or autosome). (B) The distribution of transcription units on the X-specific region. The transcription unit total for the X includes the protein coding genes, pseudogenes, and the missing genes (HSY-specific genes or pseudogenes not found on the X or autosome). The X transcription unit total does not include the HSY-specific genes or pseudogenes that have an autosomal homolog.



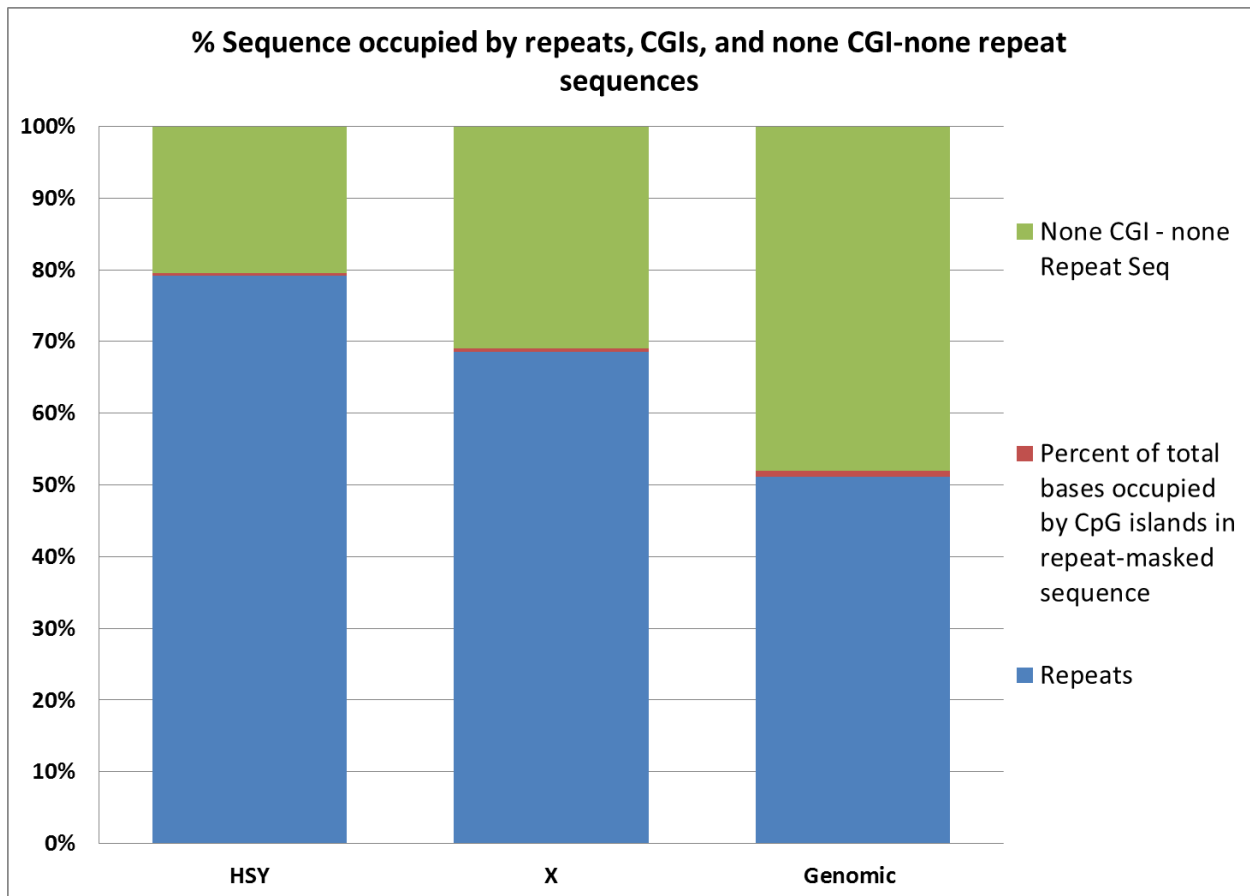

**Fig. S11.** Abundance of Papaya specific repeats and CpG clusters in non repeat region of HSY, X and genome of papaya. HSY and its X counterpart accumulate proportionally less CpG islands (CGIs) sequences compared to the rest of the genome

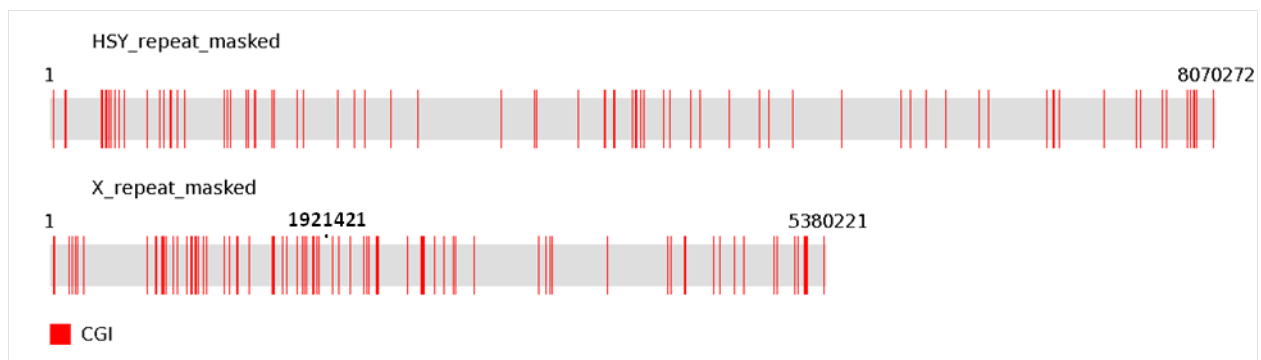

**Fig. S12.** Distribution of CpG islands on the HSY and X pseudomolecules (including the 1.9-Mb Knob 1 region).

## Supplemental Tables

**Table S1. Interspersed repeats in the papaya sex chromosomal sequences.**

| Sequence source             | HSY (8,070,272bp) |                      |                             | X (3,415,880bp) |                      |                             | LG1 excluding X specific and knob1 region (19,057,724 bp) |                      |                             |
|-----------------------------|-------------------|----------------------|-----------------------------|-----------------|----------------------|-----------------------------|-----------------------------------------------------------|----------------------|-----------------------------|
| Repeat class/family         | No. of elements   | Length occupied (bp) | Percentage of sequences (%) | No. of elements | Length occupied (bp) | Percentage of sequences (%) | No. of elements                                           | Length occupied (bp) | Percentage of sequences (%) |
| Retroelements:              | 3962              | 3,491,027            | 43.3                        | 1,470           | 1,544,912            | 44.7                        | 2,598                                                     | 2,504,893            | 18.7                        |
| <i>LINEs</i>                | 54                | 41330                | 0.5                         | 55              | 37074                | 1.1                         | 203                                                       | 118,124              | 0.9                         |
| LTR elements:               | 3908              | 3,449,697            | 42.8                        | 1,415           | 1,507,838            | 43.6                        | 2,395                                                     | 2,386,769            | 17.8                        |
| <i>Ty1/Copia</i>            | 349               | 358,804              | 4.5                         | 284             | 273,411              | 7.9                         |                                                           | 403,142              | 3.0                         |
| <i>Ty3/Gypsy</i>            | 2541              | 2,404,485            | 29.8                        | 835             | 950,748              | 27.5                        | 1,478                                                     | 1,674,755            | 12.5                        |
| DNA transposons:            | 9                 | 6,732                | 0.1                         | 10              | 1,357                | 0                           | 68                                                        | 8,940                | 0.1                         |
| <i>En-Spm</i>               | 1                 | 81                   | 0                           | 0               | 0                    | 0                           | 28                                                        | 2,061                | 0.0                         |
| MuDR-IS905                  |                   |                      |                             | 1               | 93                   | 0                           | 4                                                         | 353                  | 0.0                         |
| Unclassified:               | 5,504             | 2,902,233            | 36                          | 1,601           | 776,581              | 22.5                        | 2,288                                                     | 1,004,992            | 7.5                         |
| Total interspersed repeats: | 9,475             | 6,399,992            | 79.3                        | 3,081           | 2,322,850            | 67.2                        | 4,954                                                     | 3,518,880            | 26.2                        |

**Table S2. Abundances of sex-specific repeats.**

| Sequence source                | HSY              | Corresponding X  | Corresponding X and knob1 region |
|--------------------------------|------------------|------------------|----------------------------------|
| Numbers of repeat elements     | 1,944            | 376              | 486                              |
| Length occupied (bp)           | 866,694          | 152,346          | 188,550                          |
| Percentage of the sequence (%) | 10.7             | 4.4              | 3.5                              |
| Total sequence length (bp)     | <b>8,070,272</b> | <b>3,415,880</b> | <b>5,850,206</b>                 |

**Table S3. Numbers of tandem repeats in the HSY and its X counterpart.**

| HSY                              | Block number | Copy number    | Variants    | Total length/HSY %    |
|----------------------------------|--------------|----------------|-------------|-----------------------|
| <b>Microsatellites (1-6 bp)</b>  |              |                |             |                       |
| Mononucleotide                   | 20           | 777            | 2           | 777                   |
| Dinucleotide                     | 82           | 3891           | 7           | 7782                  |
| Trinucleotide                    | 60           | 1018.1         | 15          | 3054.3                |
| Tetranucleotide                  | 9            | 119.5          | 9           | 478                   |
| Pentanucleotide                  | 84           | 865.2          | 14          | 4326                  |
| Hexanucleotide                   | 22           | 550.8          | 16          | 3304.8                |
| <b>Total</b>                     | <b>277</b>   | <b>7221.6</b>  | <b>63</b>   | <b>19722.1/0.25%</b>  |
| <b>Minisatellites (7-100 bp)</b> |              |                |             |                       |
| 7-30 bp                          | 1135         | 3256.2         | 779         | 57230.6               |
| 31-50 bp                         | 151          | 390.4          | 105         | 15349.2               |
| 51-70 bp                         | 69           | 201.7          | 56          | 12042.3               |
| 71-99 bp                         | 34           | 83.6           | 26          | 6904.2                |
| <b>Total</b>                     | <b>1389</b>  | <b>3931.9</b>  | <b>966</b>  | <b>91526.3/1.14%</b>  |
| <b>Satellites (&gt;100 bp)</b>   |              |                |             |                       |
| 100-200 bp                       | 55           | 114.8          | 46          | 15808.8               |
| 201-300 bp                       | 24           | 51.3           | 20          | 12964.3               |
| 301-400 bp                       | 99           | 403            | 27          | 131416.6              |
| >400 bp                          | 20           | 73.3           | 19          | 33862.2               |
| <b>Total</b>                     | <b>198</b>   | <b>642.4</b>   | <b>112</b>  | <b>194051.9/2.43%</b> |
| <b>Grand Total</b>               | <b>1864</b>  | <b>11795.9</b> | <b>1141</b> | <b>305300.2/3.82%</b> |

| X counterpart                    | Block number | Copy number   | Variants   | Total length/X %      |
|----------------------------------|--------------|---------------|------------|-----------------------|
| <b>Microsatellites (1-6 bp)</b>  |              |               |            |                       |
| Mononucleotide                   | 38           | 1155          | 3          | 1155                  |
| Dinucleotide                     | 134          | 2694          | 9          | 5388                  |
| Trinucleotide                    | 45           | 737.8         | 14         | 2213.4                |
| Tetranucleotide                  | 8            | 85.8          | 7          | 343.2                 |
| Pentanucleotide                  | 47           | 441.4         | 15         | 2207                  |
| Hexanucleotide                   | 36           | 309.3         | 26         | 1855.8                |
| <b>Total</b>                     | <b>308</b>   | <b>5423.3</b> | <b>74</b>  | <b>13162.4/0.26%</b>  |
| <b>Minisatellites (7-100 bp)</b> |              |               |            |                       |
| 7-30 bp                          | 761          | 2486.3        | 531        | 39493.3               |
| 31-50 bp                         | 110          | 295.3         | 79         | 11508.4               |
| 51-70 bp                         | 31           | 71.9          | 27         | 4236.8                |
| 71-99 bp                         | 45           | 96.4          | 72         | 8125.4                |
| <b>Total</b>                     | <b>947</b>   | <b>2949.9</b> | <b>709</b> | <b>63363.9/1.27%</b>  |
| <b>Satellites (&gt;100 bp)</b>   |              |               |            |                       |
| 100-200 bp                       | 71           | 210.6         | 55         | 26236.4               |
| 201-300 bp                       | 8            | 16.5          | 8          | 3935                  |
| 301-400 bp                       | 33           | 147.7         | 13         | 48621.8               |
| >400 bp                          | 1            | 2             | 1          | 962                   |
| <b>Total</b>                     | <b>113</b>   | <b>376.8</b>  | <b>77</b>  | <b>79755.2/1.6%</b>   |
| <b>Grand Total</b>               | <b>1368</b>  | <b>8750</b>   | <b>860</b> | <b>156281.5/3.13%</b> |

**Table S4. Transposable elements in the two HSY expansion blocks.**

| <b>Transposable elements</b> | <b>Block1 (1,370,471 bp)</b> |                             |                       | <b>Block2 (1,921,971 bp)</b> |                             |                       |
|------------------------------|------------------------------|-----------------------------|-----------------------|------------------------------|-----------------------------|-----------------------|
|                              | <b># of repeat elements</b>  | <b>Length occupied (bp)</b> | <b>Percentage (%)</b> | <b># of repeat elements</b>  | <b>Length occupied (bp)</b> | <b>Percentage (%)</b> |
| Retroelements                | 1,185                        | 883,176                     | 64.4                  | 1,736                        | 1,363,277                   | 70.9                  |
| LTR                          | 1,185                        | 883,176                     | 64.4                  | 1,736                        | 1,363,277                   | 70.9                  |
| Ty1/Copia                    | 51                           | 29,601                      | 2.2                   | 39                           | 9806                        | 0.5                   |
| Gypsy/DIRS1                  | 836                          | 626,311                     | 45.7                  | 1,284                        | 996,331                     | 51.8                  |
| DNA transposons              | 4                            | 3243                        | 0.2                   | 0                            | 0                           | 0                     |
| Unclassified                 | 774                          | 273,308                     | 19.9                  | 948                          | 312,015                     | 16.2                  |
| Total interspersed repeats   | 1,963                        | 1,159,727                   | 84.6                  | 2,684                        | 1,675,292                   | 87.2                  |

**Table S5. List of XY<sup>h</sup> gene and pseudogene pairs in shown in Figures 1, S8 and S9.**

| Figure 1 & S8-S9 ID | Gene Symbol                                 | Putative Function                                 | Number of Exons |     | Coding Sequence Length |      | Intron length |       | Autosome Homolog |             |            |
|---------------------|---------------------------------------------|---------------------------------------------------|-----------------|-----|------------------------|------|---------------|-------|------------------|-------------|------------|
|                     |                                             |                                                   | X               | HSY | X                      | HSY  | X             | HSY   | Linkage Group    | Supercontig | % identity |
|                     |                                             |                                                   |                 |     |                        |      |               |       |                  |             |            |
| 1                   | PXCpXY <sup>h</sup> 15 $\diamond$           | ---NA---                                          | 1               | 1   | 965                    | 965  | n/a           | n/a   |                  |             |            |
| 2                   | CpXY <sup>h</sup> 1                         | Regulator of Vps4 activity in the MVB pathway     | 6               | 6   | 2280                   | 2265 | 2890          | n/a   |                  |             |            |
| 3                   | CpXY <sup>h</sup> 2                         | Somatic embryogenesis receptor kinase             | 11              | 11  | 1884                   | 1884 | 3734          | 3702  |                  |             |            |
| 4                   | CpXY <sup>h</sup> 3                         | Exocyst complex subunit SEC6                      | 25              | 25  | 2268                   | 2268 | 40497         | 7483  |                  |             |            |
| 5                   | PY <sup>h</sup> CpXY <sup>h</sup> 2         | ---NA---                                          | 1               | 1   | 369                    | 380  | n/a           | n/a   |                  |             |            |
| 6                   | PY <sup>h</sup> CpXY <sup>h</sup> 3         | ---NA---                                          | 1               | 2   | 600                    | 599  | n/a           | 5049  |                  |             |            |
| 7                   | **CpXY <sup>h</sup> 4                       | Late embryogenesis abundant protein 18            | 1               | 1   | 293                    | 293  | n/a           | n/a   |                  |             |            |
| 8                   | **PY <sup>h</sup> CpXY <sup>h</sup> 5       | ---NA---                                          | 1               | 1   | 261                    | 260  | n/a           | n/a   |                  |             |            |
|                     |                                             |                                                   |                 | 1   |                        | 260  | n/a           | n/a   |                  |             |            |
| 9                   | PY <sup>h</sup> CpXY <sup>h</sup> 7         | ---NA---                                          | 7               | 6   | 813                    | 579  | 2034          | 700   |                  |             |            |
| 10                  | CpXY <sup>h</sup> 5                         | 4-nitrophenylphosphatase                          | 8               | 8   | 807                    | 816  | 2444          | 2448  |                  |             |            |
| 11                  | CpXY <sup>h</sup> 6                         | FRA3 inositol or phosphatidylinositol phosphatase | 10              | 10  | 3336                   | 3336 | 40354         | 65434 |                  |             |            |
| 12                  | CpXY <sup>h</sup> 7                         | Leucine zipper-ef-hand (Ca binding motif)         | 14              | 14  | 2271                   | 2286 | 10175         | 19777 |                  |             |            |
| 13                  | CpXY <sup>h</sup> 8                         | SYN4 (SISTER CHROMATID COHESION 1 PROTEIN 4       | 15              | 15  | 3618                   | 3612 | 10487         | 9257  |                  |             |            |
| 14                  | CpXY <sup>h</sup> 9                         | Transcription regulator                           | 1               | 1   | 1161                   | 1161 | n/a           | n/a   |                  |             |            |
| 15                  | PXCpXY <sup>h</sup> 6 $\ddagger$ $\diamond$ | latex cyanogenic beta glucosidase                 | 11              | 13  | 1150                   | 1467 | 49422         | 63949 |                  |             |            |
| 16                  | PXCpXY <sup>h</sup> 10 $\diamond$           | RNA recognition splicing factor                   | 14              | 16  | 1550                   | 1834 | 18033         | 33985 |                  |             |            |
| 17                  | PXCpXY <sup>h</sup> 14                      | Chromatin/Nucleosome assembly factor              | 15              | 19  | 2420                   | 2736 | 4299          | 6282  |                  |             |            |
| 18                  | CpXY <sup>h</sup> 10                        | Flowering locus t                                 | 4               | 4   | 525                    | 525  | 1749          | 2024  |                  |             |            |
| 19                  | PXCpXY <sup>h</sup> 21                      | ---NA---                                          | 1               | 1   | 346                    | 363  | n/a           | n/a   | 10 & 8           | 35          | 90%        |

| Figure 1 & S8-S9 ID | Gene Symbol                          | Putative Function                                      | Number of Exons |     | Coding Sequence Length |      | Intron length |       | Autosome Homolog |             |            |
|---------------------|--------------------------------------|--------------------------------------------------------|-----------------|-----|------------------------|------|---------------|-------|------------------|-------------|------------|
|                     |                                      |                                                        | X               | HSY | X                      | HSY  | X             | HSY   | Linkage Group    | Supercontig | % identity |
|                     |                                      |                                                        |                 |     |                        |      |               |       |                  |             |            |
| 20                  | PY <sup>h</sup> CpXY <sup>h</sup> 22 | Vps51/Vps67 family protein                             | 6               | 5   | 3240                   | 3045 | 16497         | 16473 |                  |             |            |
| 21                  | PXCpXY <sup>h</sup> 22               | ---NA---                                               | 1               | 1   | 407                    | 432  | n/a           | n/a   |                  |             |            |
| 22                  | PXY <sup>h</sup> CpXY <sup>h</sup> 1 | universal stress protein (USP) family protein          | 4               | 4   | 852                    | 840  | 37086         | 34346 |                  |             |            |
| 23                  | PY <sup>h</sup> CpXY <sup>h</sup> 23 | Hypothetical protein                                   | 1               | 1   | 339                    | 326  | n/a           | n/a   |                  |             |            |
| 24                  | CpXY <sup>h</sup> 11                 | PWWP domain-containing protein                         | 1               | 1   | 3126                   | 3111 | n/a           | n/a   |                  |             |            |
| 25                  | CpXY <sup>h</sup> 12                 | ADP-ribosylation factor A1B                            | 5               | 6   | 552                    | 558  | 6244          | 7526  |                  |             |            |
| 26                  | CpXY <sup>h</sup> 13                 | R2R3 Myb24 transcription factor (MYB24),               | 3               | 3   | 579                    | 579  | 2527          | 2613  |                  |             |            |
| 27                  | CpXY <sup>h</sup> 14                 | Monodehydroascorbate reductase                         | 7               | 7   | 1437                   | 1437 | 5378          | 16264 |                  |             |            |
| 28                  | CpXY <sup>h</sup> 15                 | FU (FUSED); protein serine/threonine kinase            | 20              | 20  | 3804                   | 3828 | 22887         | 22993 |                  |             |            |
| 29                  | CpXY <sup>h</sup> 16                 | Proteasome complex subunit                             | 2               | 2   | 237                    | 237  | 3485          | 3515  | unknown          | 1914        | 100        |
| 30                  | CpXY <sup>h</sup> 17                 | Peptidyl-prolyl cis-trans isomerase (CYP38)            | 7               | 7   | 1347                   | 1347 | 3097          | 3088  |                  |             |            |
| 31                  | CpXY <sup>h</sup> 18                 | Ruptured pollen grain 1                                | 6               | 6   | 744                    | 744  | 2458          | 2679  |                  |             |            |
| 32                  | PY <sup>h</sup> CpXY <sup>h</sup> 27 | ---NA---                                               | 2               | 2   | 252                    | 239  | 36            | 36    |                  |             |            |
| 33                  | CpXY <sup>h</sup> 19                 | Sequence-specific DNA binding                          | 4               | 4   | 819                    | 819  | 4481          | 4482  |                  |             |            |
| 34                  | CpXY <sup>h</sup> 20                 | MBD9, methyl-CpG binding                               | 11              | 11  | 6612                   | 6609 | 22522         | 37067 |                  |             |            |
| 35                  | CpXY <sup>h</sup> 21                 | Porin family 3                                         | 14              | 14  | 1272                   | 1272 | 13810         | 13791 |                  |             |            |
| 36                  | PY <sup>h</sup> CpXY <sup>h</sup> 28 | DegP protease precursor                                | 7               | 7   | 1029                   | 1029 | 6420          | 6612  |                  |             |            |
| 37                  | CpXY <sup>h</sup> 22                 | MYB family transcription factor                        | 2               | 2   | 243                    | 243  | 166           | 166   |                  |             |            |
| 38                  | CpXY <sup>h</sup> 23                 | Carbonate dehydratase, zinc ion binding                | 9               | 9   | 1011                   | 1011 | 2022          | 2031  |                  |             |            |
| 39                  | CpXY <sup>h</sup> 24                 | 5'-AMP-activated protein kinase beta-1 subunit-related | 10              | 10  | 1779                   | 1779 | 7079          | 7134  |                  |             |            |
| 40                  | CpXY <sup>h</sup> 25                 | Hypothetical protein                                   | 2               | 2   | 549                    | 555  | 273           | 273   |                  |             |            |
| 41                  | CpXY <sup>h</sup> 26                 | Phospholipid-transporting ATPase                       | 9               | 9   | 2703                   | 2718 | 4903          | 4772  |                  |             |            |

| Figure 1 & S8-S9 ID | Gene Symbol                         | Putative Function                                             | Number of Exons |     | Coding Sequence Length |      | Intron length |       | Autosome Homolog |             |            |
|---------------------|-------------------------------------|---------------------------------------------------------------|-----------------|-----|------------------------|------|---------------|-------|------------------|-------------|------------|
|                     |                                     |                                                               | X               | HSY | X                      | HSY  | X             | HSY   | Linkage Group    | Supercontig | % identity |
|                     |                                     |                                                               |                 |     |                        |      |               |       |                  |             |            |
| 42                  | PXY <sup>h</sup> CpXY <sup>h2</sup> | ---NA---                                                      | 2               | 2   | 306                    | 306  | 54            | 54    |                  |             |            |
| 43                  | PY <sup>h</sup> CpXY <sup>h30</sup> | ---NA---                                                      | 1               | 1   | 684                    | 682  | n/a           | n/a   |                  |             |            |
| 44                  | CpXY <sup>h27</sup>                 | protein kinase                                                | 19              | 19  | 2052                   | 2052 | 8744          | 8696  |                  |             |            |
| 45                  | CpXY <sup>h28</sup>                 | Proteasome assembly chaperone 3                               | 5               | 5   | 264                    | 264  | 1019          | 1015  |                  |             |            |
| 46                  | PY <sup>h</sup> CpXY <sup>h31</sup> | Hypothetical protein                                          | 2               | 1   | 465                    | 290  | 157           | n/a   | unknown          | 3104        | 94         |
| 47                  | CpXY <sup>h29</sup>                 | N-acetylglucosamine-phosphate mutase                          | 9               | 7   | 1686                   | 1362 | 32248         | 19588 |                  |             |            |
| 48                  | CpXY <sup>h30</sup>                 | NUC (nutcracker); nucleic acid binding                        | 1               | 1   | 209                    | 312  | n/a           | n/a   |                  |             |            |
| 49                  | CpXY <sup>h31</sup>                 | Asymmetric leaves 2                                           | 1               | 1   | 618                    | 618  | n/a           | n/a   |                  |             |            |
| 50                  | PXY <sup>h</sup> CpXY <sup>h3</sup> | chloroplast ribosomal protein L12 and tRNA-Protein            | 1               | 1   | 722                    | 652  | n/a           | n/a   |                  |             |            |
| 51                  | CpXY <sup>h32</sup>                 | Ribonuclease P subunit                                        | 3               | 3   | 747                    | 747  | 503           | 503   | unknown          | 45          | 89-92      |
| 52                  | CpXY <sup>h33</sup>                 | Protein kinase atmrk1                                         | 4               | 4   | 504                    | 681  | 1559          | 1559  |                  |             |            |
| 53                  | CpXY <sup>h34</sup>                 | Metal-dependent phosphohydrolase HD domain-containing protein | 19              | 18  | 1413                   | 1413 | 7477          | 7339  |                  |             |            |
| 54                  | CpXY <sup>h35</sup>                 | Calcium homeostasis regulator-like protein                    | 3               | 3   | 819                    | 819  | 873           | 883   |                  |             |            |
| 55                  | CpXY <sup>h36</sup>                 | Formate dehydrogenase                                         | 6               | 6   | 1149                   | 1149 | 1496          | 1497  |                  |             |            |
| 56                  | CpXY <sup>h37</sup>                 | ERA1 (ENHANCED RESPONSE TO ABA 1); farnesyltransferase        | 14              | 14  | 1299                   | 1299 | 5840          | 5859  |                  |             |            |
| 57                  | CpXY <sup>h38</sup>                 | Integral membrane protein                                     | 3               | 3   | 903                    | 903  | 1285          | 1285  |                  |             |            |
| 58                  | CpXY <sup>h39</sup>                 | Exonuclease family protein                                    | 6               | 6   | 1017                   | 1017 | 718           | 718   |                  |             |            |
| 59                  | CpXY <sup>h40</sup>                 | Kinesin light chain                                           | 2               | 2   | 1845                   | 1845 | 80            | 80    |                  |             |            |
| 60                  | CpXY <sup>h41</sup>                 | Carboxylic ester hydrolase                                    | 5               | 5   | 1149                   | 1150 | 1369          | 1368  |                  |             |            |
| 61                  | CpXY <sup>h42</sup>                 | AO (L-ASPARTATE OXIDASE); oxidoreductase                      | 7               | 7   | 1956                   | 1956 | 3349          | 3349  |                  |             |            |
| 62                  | CpXY <sup>h43</sup>                 | ADP-ribosylation factor                                       | 10              | 10  | 1287                   | 1287 | 15535         | 15247 |                  |             |            |
| 63                  | CpXY <sup>h44</sup>                 | Protein phosphatase 4 core regulatory subunit R2              | 9               | 9   | 897                    | 897  | 29605         | 31227 |                  |             |            |

| Figure 1 & S8-S9 ID | Gene Symbol                          | Putative Function                                              | Number of Exons |     | Coding Sequence Length |      | Intron length |       | Autosome Homolog |             |            |
|---------------------|--------------------------------------|----------------------------------------------------------------|-----------------|-----|------------------------|------|---------------|-------|------------------|-------------|------------|
|                     |                                      |                                                                | X               | HSY | X                      | HSY  | X             | HSY   | Linkage Group    | Supercontig | % identity |
|                     |                                      |                                                                |                 |     |                        |      |               |       |                  |             |            |
| 64                  | CpXY <sup>h</sup> 45                 | Guanosine-3',5'-bis(diphosphate) 3'-pyrophosphohydrolase       | 11              | 11  | 1419                   | 1419 | 41434         | 41537 |                  |             |            |
| 65                  | CpXY <sup>h</sup> 46                 | ---NA---                                                       | 1               | 1   | 498                    | 498  | n/a           | n/a   |                  |             |            |
| 66                  | CpXY <sup>h</sup> 47                 | exportin 1a                                                    | 35              | 35  | 3627                   | 3615 | 17326         | 17187 |                  |             |            |
| 67                  | CpXY <sup>h</sup> 48                 | Mitochondrial NADH ubiquinone oxidoreductase 13kd-like subunit | 2               | 2   | 174                    | 174  | 158           | 158   |                  |             |            |
| 68                  | PXY <sup>h</sup> CpXY <sup>h</sup> 4 | ---NA---                                                       | 1               | 1   | 905                    | 909  | n/a           | n/a   |                  |             |            |
| 69                  | CpXY <sup>h</sup> 49                 | Pentatricopeptide repeat-containing protein                    | 10              | 10  | 3354                   | 3354 | 3148          | 3156  |                  |             |            |
| 70                  | CpXY <sup>h</sup> 50                 | Hypothetical protein                                           | 2               | 2   | 309                    | 309  | 81            | 81    |                  |             |            |

PXY<sup>h</sup>CpXY<sup>h</sup> = Both X and Y<sup>h</sup> transcript units are pseudogenes

PXCpXY<sup>h</sup> = X transcript is a pseudogene

PY<sup>h</sup>CpXY<sup>h</sup> = Y<sup>h</sup> transcript is a pseudogene

\*\*Gene is duplicated

NA- Not Available



**Table S6. Estimated synonymous and non-synonymous nucleotide divergence between X-HSY gene pairs.**

| Gene ID                             | No. Sites (bp) |                    |           |               | No. Mutations |                   | Ks    | Ka    | Ka/Ks | Average Ks Value ± SE |             |
|-------------------------------------|----------------|--------------------|-----------|---------------|---------------|-------------------|-------|-------|-------|-----------------------|-------------|
|                                     | Total Site     | Total Coding sites | Syn sites | Non-Syn sites | Syn Mutations | Non-Syn mutations |       |       |       |                       |             |
| PXCpXY <sup>h15</sup> ∅             | 965            | 373                | 84.17     | 284.83        | 0             | 0                 | 0.000 | 0.000 | n/a   | 0.094 ± 0.011         | Inversion 1 |
| CpXY <sup>h1</sup>                  | 5170           | 2265               | 530.08    | 1734.92       | 22            | 35                | 0.044 | 0.021 | 0.475 |                       |             |
| CpXY <sup>h2</sup>                  | 5618           | 1884               | 454.75    | 1429.25       | 24            | 4                 | 0.055 | 0.003 | 0.051 |                       |             |
| CpXY <sup>h3</sup>                  | 2268           | 2265               | 520.25    | 1744.75       | 30            | 6                 | 0.060 | 0.003 | 0.058 |                       |             |
| PY <sup>h</sup> CpXY <sup>h2</sup>  | 369            | 366                | 86.75     | 279.25        | 10            | 23                | 0.125 | 0.087 | 0.697 |                       |             |
| PY <sup>h</sup> CpXY <sup>h3</sup>  | 600            | 591                | 127.25    | 463.75        | 18            | 27                | 0.157 | 0.061 | 0.387 |                       |             |
| CpXY <sup>h4</sup>                  | 294            | 291                | 65.75     | 225.25        | 15            | 9                 | 0.272 | 0.041 | 0.151 |                       |             |
| PY <sup>h</sup> CpXY <sup>h5</sup>  | 260            | 255                | 61.17     | 193.83        | 2             | 7                 | 0.033 | 0.037 | 1.107 |                       |             |
| PY <sup>h</sup> CpXY <sup>h7</sup>  | 813            | 573                | 133.00    | 440.00        | 11            | 10                | 0.088 | 0.023 | 0.263 |                       |             |
| CpXY <sup>h5</sup>                  | 3251           | 807                | 190.17    | 616.83        | 12            | 15                | 0.066 | 0.025 | 0.374 |                       |             |
| CpXY <sup>h6</sup>                  | 43584          | 3336               | 770.83    | 2565.17       | 55            | 61                | 0.076 | 0.024 | 0.321 |                       |             |
| CpXY <sup>h7</sup>                  | 12446          | 2271               | 502.58    | 1768.42       | 32            | 36                | 0.068 | 0.021 | 0.310 |                       |             |
| CpXY <sup>h8</sup>                  | 12792          | 3603               | 816.67    | 2786.33       | 55            | 93                | 0.071 | 0.034 | 0.484 |                       |             |
| CpXY <sup>h9</sup>                  | 1161           | 1158               | 239.83    | 918.17        | 22.5          | 22.5              | 0.100 | 0.025 | 0.249 |                       |             |
| PXCpXY <sup>h6</sup>                | 50608          | 1186               | 263.67    | 918.33        | 0             | 0                 | 0.000 | 0.000 | n/a   |                       |             |
| PXCpXY <sup>h10</sup>               | 19304          | 1271               | 269.83    | 981.17        | 29            | 39                | 0.116 | 0.041 | 0.352 |                       |             |
| PXCpXY <sup>h14</sup>               | 2420           | 2406               | 492.92    | 1913.08       | 33            | 70                | 0.070 | 0.038 | 0.535 |                       |             |
| CpXY <sup>h10</sup>                 | 2274           | 525                | 128.08    | 396.92        | 14            | 5                 | 0.118 | 0.013 | 0.108 |                       |             |
| PXCpXY <sup>h21</sup>               | 363            | 322                | 70.25     | 244.75        | 12.5          | 23.5              | 0.203 | 0.103 | 0.506 |                       |             |
| PY <sup>h</sup> CpXY <sup>h22</sup> | 3240           | 3033               | 704.75    | 2328.25       | 55.5          | 65.5              | 0.083 | 0.029 | 0.345 |                       |             |
| PXCpXY <sup>h22</sup>               | 407            | 405                | 85.92     | 310.08        | 14.25         | 33.75             | 0.187 | 0.118 | 0.627 |                       |             |
| PXY <sup>h</sup> CpXY <sup>h1</sup> | 852            | 834                | 177.67    | 656.33        | 10            | 34                | 0.059 | 0.054 | 0.917 |                       |             |
| PY <sup>h</sup> CpXY <sup>h23</sup> | 339            | 326                | 60.25     | 263.75        | 7             | 28                | 0.126 | 0.114 | 0.907 |                       |             |
| CpXY <sup>h11</sup>                 | 3078           | 3063.00            | 676.67    | 2386.33       | 65.6          | 93.5              | 0.104 | 0.040 | 0.388 |                       |             |
| CpXY <sup>h12</sup>                 | 6796           | 552                | 123.50    | 428.50        | 8             | 1                 | 0.068 | 0.002 | 0.035 |                       |             |
| CpXY <sup>h13</sup>                 | 3064           | 579                | 125.50    | 0.01          | 13            | 6                 | 0.111 | 0.013 | 0.121 |                       |             |
| CpXY <sup>h14</sup>                 | 6815           | 1437               | 357.08    | 1079.92       | 26            | 16                | 0.077 | 0.015 | 0.196 |                       |             |
| CpXY <sup>h15</sup>                 | 26691          | 3804               | 901.33    | 2902.67       | 23            | 15                | 0.026 | 0.005 | 0.200 |                       |             |
| CpXY <sup>h16</sup>                 | 3723           | 237                | 35.00     | 202.00        | 1             | 0                 | 0.029 | 0.000 | 0.000 |                       |             |
| CpXY <sup>h17</sup>                 | 4444           | 1347               | 312.00    | 1035.00       | 4             | 6                 | 0.013 | 0.006 | 0.452 |                       |             |
| CpXY <sup>h18</sup>                 | 3202           | 744                | 174.50    | 569.50        | 1             | 4                 | 0.006 | 0.007 | 1.233 |                       |             |
| PY <sup>h</sup> CpXY <sup>h27</sup> | 252            | 237                | 55.00     | 182.00        | 1             | 3                 | 0.018 | 0.017 | 0.905 |                       |             |
| CpXY <sup>h19</sup>                 | 5300           | 819                | 183.17    | 635.83        | 0             | 0                 | 0.000 | 0.000 | n/a   |                       |             |
| CpXY <sup>h20</sup>                 | 6612           | 6609               | 1497.33   | 5111.67       | 18            | 17                | 0.012 | 0.003 | 0.275 |                       |             |
| CpXY <sup>h21</sup>                 | 15082          | 1272               | 290.17    | 981.83        | 6             | 1                 | 0.021 | 0.001 | 0.049 |                       |             |
| PY <sup>h</sup> CpXY <sup>h28</sup> | 7440           | 1020               | 258.33    | 758.67        | 5             | 2                 | 0.020 | 0.003 | 0.135 |                       |             |
| CpXY <sup>h22</sup>                 | 409            | 243                | 51.83     | 191.17        | 0             | 0                 | 0.000 | 0.000 | n/a   |                       |             |
| CpXY <sup>h23</sup>                 | 3033           | 1011               | 245.67    | 765.33        | 0             | 0                 | 0.000 | 0.000 | n/a   |                       |             |
| CpXY <sup>h24</sup>                 | 8858           | 1779               | 413.75    | 1365.25       | 7             | 15                | 0.017 | 0.011 | 0.648 |                       |             |
| CpXY <sup>h25</sup>                 | 822            | 549                | 119.83    | 429.17        | 1             | 1                 | 0.008 | 0.002 | 0.280 |                       |             |
| CpXY <sup>h26</sup>                 | 7606           | 2703               | 621.42    | 2081.58       | 13            | 11                | 0.021 | 0.005 | 0.250 |                       |             |
| PXY <sup>h</sup> CpXY <sup>h2</sup> | 360            | 306                | 71.17     | 231.83        | 0             | 1                 | 0.000 | 0.004 | n/a   |                       |             |
| PY <sup>h</sup> CpXY <sup>h30</sup> | 684            | 675                | 147.00    | 528.00        | 7             | 9                 | 0.049 | 0.017 | 0.350 |                       |             |
| CpXY <sup>h27</sup>                 | 11123          | 2070               | 464.08    | 1605.92       | 4             | 7                 | 0.009 | 0.004 | 0.504 |                       |             |
| CpXY <sup>h28</sup>                 | 1284           | 264                | 63.33     | 200.67        | 3             | 1                 | 0.049 | 0.005 | 0.104 |                       |             |
| PY <sup>h</sup> CpXY <sup>h31</sup> | 465            | 286                | 59.33     | 225.67        | 6             | 10                | 0.109 | 0.046 | 0.421 |                       |             |
| CpXY <sup>h29</sup>                 | 32248          | 1680               | 395.75    | 1284.25       | 14            | 23                | 0.036 | 0.018 | 0.500 |                       |             |
| CpXY <sup>h30</sup>                 | 308            | 308                | 62.00     | 244.00        | 6             | 16                | 0.104 | 0.069 | 0.662 |                       |             |
| CpXY <sup>h31</sup>                 | 618            | 618                | 144.33    | 470.67        | 12            | 1                 | 0.088 | 0.002 | 0.024 |                       |             |
| PXY <sup>h</sup> CpXY <sup>h3</sup> | 722            | 648                | 160.00    | 488.00        | 16            | 18                | 0.107 | 0.038 | 0.352 |                       |             |
| CpXY <sup>h32</sup>                 | 1260           | 747                | 168.25    | 578.75        | 3             | 13                | 0.018 | 0.023 | 1.270 |                       |             |
| CpXY <sup>h33</sup>                 | 2066           | 504                | 124.67    | 379.33        | 2             | 1                 | 0.016 | 0.003 | 0.163 |                       |             |

| Gene ID                              | No. Sites (bp) |                    |           |               | No. Mutations |                   | Ks    | Ka    | Ka/Ks | Average Ks Value<br>± SE |           |
|--------------------------------------|----------------|--------------------|-----------|---------------|---------------|-------------------|-------|-------|-------|--------------------------|-----------|
|                                      | Total Site     | Total Coding sites | Syn sites | Non-Syn sites | Syn Mutations | Non-Syn mutations |       |       |       |                          |           |
| CpXY <sup>h</sup> 34                 | 8970           | 1413               | 312.25    | 1100.75       | 6             | 3                 | 0.019 | 0.003 | 0.140 | 0.007<br>±<br>0.002      | Collinear |
| CpXY <sup>h</sup> 35                 | 1693           | 819                | 188.67    | 630.33        | 0             | 0                 | 0.000 | 0.000 | n/a   |                          |           |
| CpXY <sup>h</sup> 36                 | 2629           | 1149               | 267.50    | 881.50        | 0             | 0                 | 0.000 | 0.000 | n/a   |                          |           |
| CpXY <sup>h</sup> 37                 | 7139           | 1299               | 300.17    | 998.83        | 2             | 5                 | 0.007 | 0.005 | 0.753 |                          |           |
| CpXY <sup>h</sup> 38                 | 2188           | 903                | 197.17    | 705.83        | 1             | 0                 | 0.005 | 0.000 | 0.000 |                          |           |
| CpXY <sup>h</sup> 39                 | 1743           | 1017               | 226.00    | 791.00        | 0             | 0                 | 0.000 | 0.000 | n/a   |                          |           |
| CpXY <sup>h</sup> 40                 | 1925           | 1845               | 421.50    | 1423.50       | 2             | 2                 | 0.005 | 0.001 | 0.296 |                          |           |
| CpXY <sup>h</sup> 41                 | 2518           | 1149               | 270.67    | 878.33        | 1             | 2                 | 0.004 | 0.002 | 0.619 |                          |           |
| CpXY <sup>h</sup> 42                 | 5296           | 1956               | 468.17    | 1487.83       | 2             | 1                 | 0.004 | 0.001 | 0.157 |                          |           |
| CpXY <sup>h</sup> 43                 | 16795          | 1287               | 267.00    | 1020.00       | 3             | 5                 | 0.013 | 0.005 | 0.411 |                          |           |
| CpXY <sup>h</sup> 44                 | 30503          | 897                | 192.92    | 704.08        | 4             | 2                 | 0.021 | 0.003 | 0.136 |                          |           |
| CpXY <sup>h</sup> 45                 | 42869          | 1419               | 340.17    | 1078.83       | 2             | 2                 | 0.006 | 0.002 | 0.315 |                          |           |
| CpXY <sup>h</sup> 46                 | 498            | 495                | 130.00    | 365.00        | 1             | 0                 | 0.008 | 0.000 | 0.000 |                          |           |
| CpXY <sup>h</sup> 47                 | 3615           | 3609               | 808.92    | 2800.08       | 4             | 1                 | 0.005 | 0.000 | 0.073 |                          |           |
| CpXY <sup>h</sup> 48                 | 333            | 174                | 38.83     | 135.17        | 0             | 0                 | 0.000 | 0.000 | n/a   |                          |           |
| PXY <sup>h</sup> CpXY <sup>h</sup> 4 | 906            | 906                | 196.67    | 709.33        | 4             | 5                 | 0.021 | 0.007 | 0.343 |                          |           |
| CpXY <sup>h</sup> 49                 | 6503           | 3354               | 747.67    | 2606.33       | 3             | 10                | 0.004 | 0.004 | 0.958 |                          |           |
| CpXY <sup>h</sup> 50                 | 391            | 309                | 63.83     | 245.17        | 0             | 0                 | 0.000 | 0.000 | n/a   |                          |           |

**Table S7. Estimated age of divergence X-HSY gene pairs.**

| Gene ID              | Silent Sites | Silent mutations | Silent divergence ( $K_{sil}$ ) | Estimated age (MYA) | Average Estimated age (MYA) $\pm$ SE |             |
|----------------------|--------------|------------------|---------------------------------|---------------------|--------------------------------------|-------------|
| CpXY <sup>h</sup> 1  | 3412.08      | 51               | 0.015                           | 1.906               | 7.033<br>$\pm$<br>0.853              | Inversion 1 |
| CpXY <sup>h</sup> 2  | 4153.75      | 127              | 0.031                           | 3.903               |                                      |             |
| CpXY <sup>h</sup> 5  | 2615.17      | 154              | 0.061                           | 7.666               |                                      |             |
| CpXY <sup>h</sup> 6  | 38859.83     | 7551             | 0.225                           | ---                 |                                      |             |
| CpXY <sup>h</sup> 7  | 10088.58     | 629              | 0.065                           | 8.144               |                                      |             |
| CpXY <sup>h</sup> 8  | 9999.70      | 608              | 0.063                           | 7.925               |                                      |             |
| CpXY <sup>h</sup> 10 | 1872.08      | 93               | 0.051                           | 6.425               |                                      |             |
| CpXY <sup>h</sup> 12 | 6293.50      | 454              | 0.076                           | 9.475               |                                      |             |
| CpXY <sup>h</sup> 13 | 2613.50      | 186              | 0.075                           | 9.348               |                                      |             |
| CpXY <sup>h</sup> 14 | 5627.08      | 366              | 0.068                           | 8.505               |                                      |             |
| CpXY <sup>h</sup> 15 | 23714.33     | 721              | 0.031                           | 3.880               | 1.931<br>$\pm$<br>0.447              | Inversion 2 |
| CpXY <sup>h</sup> 16 | 3516.00      | 42               | 0.012                           | 1.505               |                                      |             |
| CpXY <sup>h</sup> 17 | 3376.00      | 30               | 0.009                           | 1.118               |                                      |             |
| CpXY <sup>h</sup> 18 | 2618.50      | 46               | 0.018                           | 2.223               |                                      |             |
| CpXY <sup>h</sup> 19 | 4667.17      | 1                | 0.000                           | 0.025               |                                      |             |
| CpXY <sup>h</sup> 21 | 13994.17     | 741              | 0.055                           | 6.864               |                                      |             |
| CpXY <sup>h</sup> 22 | 220.83       | 0                | 0.000                           | 0.000               |                                      |             |
| CpXY <sup>h</sup> 23 | 2261.67      | 13               | 0.006                           | 0.721               |                                      |             |
| CpXY <sup>h</sup> 24 | 7478.75      | 117              | 0.016                           | 1.976               |                                      |             |
| CpXY <sup>h</sup> 25 | 395.83       | 1                | 0.003                           | 0.316               |                                      |             |
| CpXY <sup>h</sup> 26 | 5393.42      | 121              | 0.023                           | 2.848               |                                      |             |
| CpXY <sup>h</sup> 27 | 9451.08      | 131              | 0.014                           | 1.750               |                                      |             |
| CpXY <sup>h</sup> 28 | 1082.33      | 20               | 0.019                           | 2.339               |                                      |             |
| CpXY <sup>h</sup> 29 | 25702.75     | 2335             | 0.097                           | ---                 |                                      |             |
| CpXY <sup>h</sup> 32 | 674.25       | 11               | 0.016                           | 2.061               |                                      |             |
| CpXY <sup>h</sup> 33 | 1686.67      | 18               | 0.011                           | 1.344               |                                      |             |
| CpXY <sup>h</sup> 34 | 7617.25      | 77               | 0.010                           | 1.273               |                                      |             |
| CpXY <sup>h</sup> 35 | 1065.67      | 0                | 0.000                           | 0.000               | 0.619<br>$\pm$<br>0.121              | Collinear   |
| CpXY <sup>h</sup> 36 | 1749.50      | 3                | 0.002                           | 0.215               |                                      |             |
| CpXY <sup>h</sup> 37 | 6137.17      | 35               | 0.006                           | 0.715               |                                      |             |
| CpXY <sup>h</sup> 38 | 1485.17      | 1                | 0.001                           | 0.084               |                                      |             |
| CpXY <sup>h</sup> 39 | 952.00       | 0                | 0.000                           | 0.000               |                                      |             |
| CpXY <sup>h</sup> 40 | 504.50       | 2                | 0.004                           | 0.496               |                                      |             |
| CpXY <sup>h</sup> 41 | 1642.67      | 7                | 0.004                           | 0.534               |                                      |             |
| CpXY <sup>h</sup> 42 | 3807.17      | 20               | 0.005                           | 0.659               |                                      |             |
| CpXY <sup>h</sup> 43 | 15490.00     | 122              | 0.008                           | 0.994               |                                      |             |
| CpXY <sup>h</sup> 44 | 29686.92     | 134              | 0.005                           | 0.566               |                                      |             |
| CpXY <sup>h</sup> 45 | 41708.17     | 292              | 0.007                           | 0.879               |                                      |             |
| CpXY <sup>h</sup> 48 | 200.83       | 1                | 0.005                           | 0.625               |                                      |             |
| CpXY <sup>h</sup> 49 | 3899.67      | 17               | 0.004                           | 0.546               |                                      |             |
| CpXY <sup>h</sup> 50 | 148.83       | 2                | 0.014                           | 1.695               |                                      |             |

We excluded pseudogenes because of uncertainties in their alignments. Genes with incomplete BAC sequences in intron regions and single exon genes were also excluded from the analysis. Genes CpXY<sup>h</sup>6 and CpXY<sup>h</sup>29 were unable to be accurately aligned due to extreme differences in intron sizes, therefore an accurate divergence age cannot be estimated.

Note: Due to the comparatively short generation time found in Arabidopsis compared to papaya and the perennial nature of papaya, it is possible the divergence age reported here for papaya may somewhat vary from the actual divergence age.

**Table S8. Comparisons of  $K_s$  and  $K_{\text{silent}}$  between the three regions identified by the inversions-**

| Comparison                                                      | $K_{\text{silent}}$ |         | $K_s$   |         |
|-----------------------------------------------------------------|---------------------|---------|---------|---------|
|                                                                 | Z value             | P value | Z value | P value |
| <b>Gene pairs</b>                                               |                     |         |         |         |
| Inversion 1 versus inversion 2 genes                            | -3.24               | 0.002   | -4.16   | <0.0001 |
| Inversion 2 versus collinear region genes                       | -2.84               | 0.004   | -2.47   | 0.013   |
| All sequence pairs, including single exon genes and pseudogenes |                     |         |         |         |
| Inversion 1 versus inversion 2 genes                            | —                   | —       | 3.67    | 0.0002  |
| Inversion 2 versus collinear region genes                       | —                   | —       | -3.10   | 0.0018  |

**Table S9. Pairs of genes found in both the X and Y<sup>h</sup> sequences, and their positions in the X and HSY pseudomolecules.**

| Gene Symbol          | Putative Function                                 | # of Exons |     | Coding Sequence Length |      | Intron length |       | Autosome Homolog |                |            | BAC           |         |               |         | Inversion |
|----------------------|---------------------------------------------------|------------|-----|------------------------|------|---------------|-------|------------------|----------------|------------|---------------|---------|---------------|---------|-----------|
|                      |                                                   | X          | HSY | X                      | HSY  | X             | HSY   | Linkage Group #  | Superc ontig # | % identity | Position      | ID      | Position      | ID      |           |
|                      |                                                   |            |     |                        |      |               |       |                  |                |            | X             |         | HSY           |         |           |
| CpXY <sup>h1</sup>   | Regulator of Vps4 activity in the MVB pathway     | 6          | 6   | 2280                   | 2265 | 2890          | 5378  |                  |                |            | 77370-82539   | SH61H02 | 97148-104790  | SH95B12 | 1         |
| CpXY <sup>h2</sup>   | Somatic embryogenesis receptor kinase             | 11         | 11  | 1884                   | 1884 | 3734          | 3702  |                  |                |            | 69931-75548   | SH61H02 | 89764-95349   | SH95B12 | 1         |
| CpXY <sup>h3</sup>   | Exocyst complex subunit SEC6                      | 25         | 25  | 2268                   | 2268 | 40497         | 7483  |                  |                |            | 66454-91181   | SH31E12 | 1-34368       | SH95B12 | 1         |
|                      |                                                   |            |     |                        |      |               |       |                  |                |            | 1-32799       | SH61H02 | 168590-173463 | SH49L11 | 1         |
| **CpXY <sup>h4</sup> | Late embryogenesis abundant protein 18            | 1          | 1   | 293                    | 293  | n/a           | n/a   |                  |                |            | 30641-30933   | SH31E12 | 103645-103938 | SH49L11 | 1         |
|                      |                                                   |            |     |                        |      |               |       |                  |                |            |               |         | 73364-73657   | SH49L11 | 1         |
| CpXY <sup>h5</sup>   | 4-nitrophenylphosphatase                          | 8          | 8   | 807                    | 816  | 2444          | 2448  |                  |                |            | 66241-69491   | SH79M13 | 95427-98690   | SH69E13 | 1         |
| CpXY <sup>h6</sup>   | FRA3 inositol or phosphatidylinositol phosphatase | 10         | 10  | 3336                   | 3336 | 40354         | 65434 |                  |                |            | 54810-98499   | SH54A04 | 6542-75311    | SH96A24 | 1         |
| CpXY <sup>h7</sup>   | Leucine zipper-ef-hand (Ca binding motif)         | 14         | 14  | 2271                   | 2286 | 10175         | 19777 |                  |                |            | 59838-72283   | SH55B21 | 113904-135966 | SH96A24 | 1         |
| CpXY <sup>h8</sup>   | SYN4 (SISTER CHROMATID COHESION 1 PROTEIN 4       | 15         | 15  | 3618                   | 3612 | 10487         | 9257  |                  |                |            | 97208-111312  | SH55B21 | 73441-86309   | SH81O12 | 1         |
| CpXY <sup>h9</sup>   | Transcription regulator                           | 1          | 1   | 1161                   | 1161 | n/a           | n/a   |                  |                |            | 187518-188678 | SH55B21 | 129678-130838 | SH81O12 | 1         |
| CpXY <sup>h10</sup>  | Flowering locus t                                 | 4          | 4   | 525                    | 525  | 1749          | 2024  |                  |                |            | 87468-89741   | SH65C15 | 55397-57945   | SH78H09 | 1         |
| CpXY <sup>h11</sup>  | PWWP domain-containing protein                    | 1          | 1   | 3126                   | 3111 | n/a           | n/a   |                  |                |            | 110760-113885 | SH69D24 | 95120-98230   | SH53G04 | 1         |
| CpXY <sup>h12</sup>  | ADP-ribosylation factor A1B                       | 5          | 6   | 552                    | 558  | 6244          | 7526  |                  |                |            | 159681-166476 | SH54M13 | 32224-40307   | SH81O12 | 1         |
| CpXY <sup>h13</sup>  | R2R3 Myb24 transcription factor (MYB24),          | 3          | 3   | 579                    | 579  | 2527          | 2613  |                  |                |            | 74982-78087   | SH46O19 | 135292-138484 | SH90D06 | 1         |
| CpXY <sup>h14</sup>  | Monodehydroascorbate reductase                    | 7          | 7   | 1437                   | 1437 | 5378          | 16264 |                  |                |            | 22083-28897   | SH46O19 | 93935-111635  | SH90D06 | 1         |
| CpXY <sup>h15</sup>  | FU (FUSED); protein serine/threonine kinase       | 20         | 20  | 3804                   | 3828 | 22887         | 22993 |                  |                |            | 33225-59915   | SH55E02 | 56523-83343   | SH72L16 | 2         |
| CpXY <sup>h16</sup>  | Proteasome complex subunit                        | 2          | 2   | 237                    | 237  | 3485          | 3515  | n/a              | 1914           | 100        | 136991-140712 | SH55E02 | 130400-134151 | SH72L16 | 2         |
| CpXY <sup>h17</sup>  | Peptidyl-prolyl cis-trans isomerase (CYP38)       | 7          | 7   | 1347                   | 1347 | 3097          | 3088  |                  |                |            | 114633-119076 | SH23D07 | 36026-40460   | AM57M14 | 2         |

| Gene Symbol          | Putative Function                                             | # of Exons |     | Coding Sequence Length |      | Intron length |       | Autosome Homolog |                |            | BAC           |         |               |          | Inversion |
|----------------------|---------------------------------------------------------------|------------|-----|------------------------|------|---------------|-------|------------------|----------------|------------|---------------|---------|---------------|----------|-----------|
|                      |                                                               | X          | HSY | X                      | HSY  | X             | HSY   | Linkage Group #  | Superc ontig # | % identity | Position      | ID      | Position      | ID       |           |
|                      |                                                               |            |     |                        |      |               |       |                  |                |            | X             |         | HSY           |          |           |
| CpXY <sup>h</sup> 18 | Ruptured pollen grain 1                                       | 6          | 6   | 744                    | 744  | 2458          | 2679  |                  |                |            | 128038-131239 | SH23D07 | 15924-19346   | SH88A07  | 2         |
| CpXY <sup>h</sup> 19 | Sequence-specific DNA binding                                 | 4          | 4   | 819                    | 819  | 4481          | 4482  |                  |                |            | 24017-29316   | SH24L08 | 51193-56493   | SH88A07  | 2         |
| CpXY <sup>h</sup> 20 | MBD9, methyl-CpG binding                                      | 11         | 11  | 6612                   | 6609 | 22522         | 37067 |                  |                |            | 166625-195755 | SH84J07 | 91204-134880  | SH05K22  | 2         |
| CpXY <sup>h</sup> 21 | Porin family 3                                                | 14         | 14  | 1272                   | 1272 | 13810         | 13791 |                  |                |            | 111656-126737 | SH84J07 | 29895-44957   | SH59G12  | 2         |
| CpXY <sup>h</sup> 22 | MYB family transcription factor                               | 2          | 2   | 243                    | 243  | 166           | 166   |                  |                |            | 87116-87524   | SH84J07 | 69860-70268   | SH59G12  | 2         |
| CpXY <sup>h</sup> 23 | Carbonate dehydratase, zinc ion binding                       | 9          | 9   | 1011                   | 1011 | 2022          | 2031  |                  |                |            | 63692-66724   | SH84J07 | 77740-80781   | SH102N12 | 2         |
| CpXY <sup>h</sup> 24 | 5'-AMP-activated protein kinase beta-1 subunit-related        | 10         | 10  | 1779                   | 1779 | 7079          | 7134  |                  |                |            | 51917-60774   | SH84J07 | 67453-76365   | SH102N12 | 2         |
| CpXY <sup>h</sup> 25 | Hypothetical protein                                          | 2          | 2   | 549                    | 555  | 273           | 273   |                  |                |            | 43556-44377   | SH84J07 | 58388-59215   | SH102N12 | 2         |
| CpXY <sup>h</sup> 26 | Phospholipid-transporting ATPase                              | 9          | 9   | 2703                   | 2718 | 4903          | 4772  |                  |                |            | 2579-10170    | SH10J17 | 120094-127583 | SH64O06  | 2         |
| CpXY <sup>h</sup> 27 | protein kinase                                                | 20         | 20  | 2091                   | 2088 | 9032          | 8988  |                  |                |            | 19577-30699   | SH53E18 | 34767-45842   | SH64O06  | 2         |
| CpXY <sup>h</sup> 28 | Proteasome assembly chaperone 3                               | 5          | 5   | 264                    | 264  | 1019          | 1015  |                  |                |            | 31445-32728   | SH53E18 | 32709-33988   | SH64O06  | 2         |
| CpXY <sup>h</sup> 29 | N-acetylglucosamine-phosphate mutase                          | 9          | 7   | 1686                   | 1362 | 32248         | 19588 |                  |                |            | 86982-119229  | SH53E18 | 87673-107260  | SH59O17  | 2         |
| CpXY <sup>h</sup> 30 | NUC (nutcracker); nucleic acid binding                        | 1          | 1   | 209                    | 312  | n/a           | n/a   |                  |                |            | 92981-93289   | SH53E18 | 92916-93227   | SH59O17  | 2         |
| CpXY <sup>h</sup> 31 | Asymmetric leaves 2                                           | 1          | 1   | 618                    | 618  | n/a           | n/a   |                  |                |            | 201739-202356 | SH53E18 | 135383-136000 | SH59O17  | 2         |
| CpXY <sup>h</sup> 32 | Ribonuclease P subunit                                        | 3          | 3   | 747                    | 747  | 503           | 503   | n/a              | 45             | 89-92      | 46758-48017   | SH87M18 | 44020-45269   | SH05K22  | 2         |
| CpXY <sup>h</sup> 33 | Protein kinase atmrk1                                         | 4          | 4   | 504                    | 681  | 1559          | 1559  |                  |                |            | 200558-202622 | SH49A07 | 57804-60043   | AM57M14  | 2         |
| CpXY <sup>h</sup> 34 | Metal-dependent phosphohydrolase HD domain-containing protein | 19         | 18  | 1413                   | 1413 | 7477          | 7339  |                  |                |            | 155987-164916 | SH49A07 | 151017-159769 | SH75H06  | Collinear |
| CpXY <sup>h</sup> 35 | Calcium homeostasis regulator-like protein                    | 3          | 3   | 819                    | 819  | 873           | 883   |                  |                |            | 150401-152093 | SH49A07 | 145436-147128 | SH75H06  | Collinear |
| CpXY <sup>h</sup> 36 | Formate dehydrogenase                                         | 6          | 6   | 1149                   | 1149 | 1496          | 1497  |                  |                |            | 147308-149953 | SH49A07 | 142343-144988 | SH75H06  | Collinear |
| CpXY <sup>h</sup> 37 | ERA1 (ENHANCED RESPONSE TO ABA 1); farnesyltransferase        | 14         | 14  | 1299                   | 1299 | 5840          | 5859  |                  |                |            | 100081-107219 | SH49A07 | 95081-102238  | SH75H06  | Collinear |
| CpXY <sup>h</sup> 38 | Integral membrane protein                                     | 3          | 3   | 903                    | 903  | 1285          | 1285  |                  |                |            | 93334-        | SH49A07 | 88332-        | SH75H06  | Collinear |

| Gene Symbol                         | Putative Function                                              | # of Exons |     | Coding Sequence Length |      | Intron length |       | Autosome Homolog |                |            | BAC      |               |          |               | Inversion |           |
|-------------------------------------|----------------------------------------------------------------|------------|-----|------------------------|------|---------------|-------|------------------|----------------|------------|----------|---------------|----------|---------------|-----------|-----------|
|                                     |                                                                | X          | HSY | X                      | HSY  | X             | HSY   | Linkage Group #  | Superc ontig # | % identity | Position | ID            | Position | ID            |           |           |
|                                     |                                                                |            |     |                        |      |               |       |                  |                |            | X        |               | HSY      |               |           |           |
|                                     |                                                                |            |     |                        |      |               |       |                  |                |            |          | 95521         |          | 90519         |           |           |
| CpXY <sup>h39</sup>                 | Exonuclease family protein                                     | 6          | 6   | 1017                   | 1017 | 718           | 718   |                  |                |            |          | 76141-77880   | SH49A07  | 71136-72875   | SH75H06   | Collinear |
| CpXY <sup>h40</sup>                 | Kinesin light chain                                            | 2          | 2   | 1845                   | 1845 | 80            | 80    |                  |                |            |          | 12067-13991   | SH49A07  | 7038-8962     | SH75H06   | Collinear |
| CpXY <sup>h41</sup>                 | Carboxylic ester hydrolase                                     | 5          | 5   | 1149                   | 1150 | 1369          | 1368  |                  |                |            |          | 8529-11046    | SH49A07  | 1176-3693     | SH58C24   | Collinear |
| CpXY <sup>h42</sup>                 | AO (L-ASPARTATE OXIDASE); oxidoreductase                       | 7          | 7   | 1956                   | 1956 | 3349          | 3349  |                  |                |            |          | 4217-5228     | SH49A07  | 6994-12298    | SH58C24   | Collinear |
| CpXY <sup>h43</sup>                 | ADP-ribosylation factor                                        | 10         | 10  | 1287                   | 1287 | 15535         | 15247 |                  |                |            |          | 167950-184772 | SH85C03  | 23653-40187   | SH58C24   | Collinear |
| CpXY <sup>h44</sup>                 | Protein phosphatase 4 core regulatory subunit R2               | 9          | 9   | 897                    | 897  | 29605         | 31227 |                  |                |            |          | 125940-156442 | SH85C03  | 51396-83520   | SH58C24   | Collinear |
| CpXY <sup>h45</sup>                 | Guanosine-3',5'-bis(diphosphate) 3'-pyrophosphohydrolase       | 11         | 11  | 1419                   | 1419 | 41434         | 41537 |                  |                |            |          | 71785-114637  | SH85C03  | 94730-137686  | SH58C24   | Collinear |
| CpXY <sup>h46</sup>                 | ---NA---                                                       | 1          | 1   | 498                    | 498  | n/a           | n/a   |                  |                |            |          | 62018-62515   | SH85C03  | 146943-147440 | SH58C24   | Collinear |
| CpXY <sup>h47</sup>                 | exportin 1a                                                    | 35         | 35  | 3627                   | 3615 | 17326         | 17187 |                  |                |            |          | 19289-40143   | SH86B15  | 84828-105629  | SH60M19   | Collinear |
| CpXY <sup>h48</sup>                 | Mitochondrial NADH ubiquinone oxidoreductase 13kd-like subunit | 2          | 2   | 174                    | 174  | 158           | 158   |                  |                |            |          | 43977-44309   | SH86B15  | 109287-109619 | SH60M19   | Collinear |
| CpXY <sup>h49</sup>                 | Pentatricopeptide repeat-containing protein                    | 10         | 10  | 3354                   | 3354 | 3148          | 3156  |                  |                |            |          | 51972-58474   | SH86B15  | 117258-123768 | SH60M19   | Collinear |
| CpXY <sup>h50</sup>                 | Hypothetical protein                                           | 2          | 2   | 309                    | 309  | 81            | 81    |                  |                |            |          | 65923-66313   | SH86B15  | 131211-131601 | SH60M19   | Collinear |
| PXY <sup>h</sup> CpXY <sup>h1</sup> | universal stress protein (USP) family protein                  | 4          | 4   | 852                    | 840  | 37086         | 34346 |                  |                |            |          | 69753-107690  | SH69D24  | 57117-92302   | SH53G04   | 1         |
| PXY <sup>h</sup> CpXY <sup>h2</sup> | ---NA---                                                       | 2          | 2   | 306                    | 306  | 54            | 54    |                  |                |            |          | 73287-73646   | SH40J04  | 73712-74071   | SH64O06   | 2         |
| PXY <sup>h</sup> CpXY <sup>h3</sup> | chloroplast ribosomal protein L12 and tRNA-Protein             | 1          | 1   | 722                    | 652  | n/a           | n/a   |                  |                |            |          | 12839-13560   | SH06M23  | 72741-94883   | SH62H24   | 2         |
| PXY <sup>h</sup> CpXY <sup>h4</sup> | ---NA---                                                       | 1          | 1   | 905                    | 909  | n/a           | n/a   |                  |                |            |          | 45572-46477   | SH86B15  | 110870-111775 | SH60M19   | Collinear |

PXY<sup>h</sup>CpXY<sup>h</sup> = Both X and Y<sup>h</sup> transcript units are pseudogenes. They are numbered in consecutive order as they appear on the X physical map.

\*\* duplication

‡ Gene spans 2 BACs

NA- Not Available

**Table S10. List of Y<sup>h</sup>-specific genes plus pseudogenes in the HSY sequence with papaya autosomal homologs**

| Gene Symbol             | Putative Function                                        | Number of Exons | Coding Sequence Length | Intron length | Autosome Homolog |               |                  | BAC                        |                  |                  | Inversion |
|-------------------------|----------------------------------------------------------|-----------------|------------------------|---------------|------------------|---------------|------------------|----------------------------|------------------|------------------|-----------|
|                         |                                                          |                 |                        |               | Super-contig #   | Linkage Group | Percent Identity | Position                   | ID               | Accession Number |           |
| CpY <sup>h</sup> -1     | hypothetical protein                                     | 2               | 273                    | 103           | 368              | NA            | 100%             | 35858-36233                | AM125I09         | AC239252         | 1         |
| CpY <sup>h</sup> -2     | ---NA---                                                 | 1               | 198                    | NA            | 1657             | NA            | 100%             | 45118-45315                | AM125I09         | AC239252         | 1         |
| CpY <sup>h</sup> -3     | ---NA---                                                 | 1               | 213                    | NA            | 10               | 5             | 81%              | 82486-82698                | SH67H04          | AC238615         | 1         |
| CpY <sup>h</sup> -4     | ---NA---                                                 | 1               | 294                    | NA            |                  |               |                  | 146858-147151              | SH81O12          | AC239165         | 1         |
| CpY <sup>h</sup> -5     | ---NA---                                                 | 2               | 153                    | 2824          |                  |               |                  | 166701-169678              | SH81O12          | AC239165         | 1         |
| PXCpXY <sup>h</sup> 6‡◊ | latex cyanogenic beta glucosidase                        | 13              | 1467                   | 63949         |                  |               |                  | 156303-178595, 40004-83126 | SH81O12, SH32G10 | AC238596         | 1         |
| CpY <sup>h</sup> -7**   | ---NA---                                                 | 1               | 237                    | NA            |                  |               |                  | 184093-184330              | SH32G10          | AC238596         | 1         |
|                         |                                                          |                 |                        |               |                  |               |                  | 77447-77683                | SH32G10          | AC238596         | 1         |
| CpY <sup>h</sup> -8     | ---NA---                                                 | 1               | 105                    | NA            | 29               | 2             | 87%              | 47046-47150                | SH32G10          | AC238596         | 1         |
| CpY <sup>h</sup> -9     | ---NA---                                                 | 1               | 318                    | NA            | 29               | 2             | 81%              | 46506-46824                | SH32G10          | AC238596         | 1         |
| PXCpXY <sup>h</sup> 10◊ | RNA recognition motif-containing protein-splicing factor | 16              | 1834                   | 35818         |                  |               |                  | 43145-78963                | SH65D15          | AC238767         | 1         |
| CpY <sup>h</sup> -11    | ---NA---                                                 | 3               | 420                    | 1231          |                  |               |                  | 38621-40271                | SH65D15          | AC238767         | 1         |
| CpY <sup>h</sup> -12    | ---NA---                                                 | 1               | 288                    | NA            |                  |               |                  | 23717-24004                | SH65D15          | AC238767         | 1         |
| CpY <sup>h</sup> -13    | ---NA---                                                 | 1               | 261                    | NA            |                  |               |                  | 22245-22705                | SH65D15          | AC238767         | 1         |
| PXCpXY <sup>h</sup> 14  | Chromatin/Nucleosome assembly factor                     | 19              | 2736                   | 6282          |                  |               |                  | 144247-153264              | SH50M09          | AC238602         | 1         |
| PXCpXY <sup>h</sup> 15◊ | ---NA---                                                 | 1               | 965                    | NA            |                  |               |                  | 45539-46503                | SH69E13          | AC238619         | 1         |
| CpY <sup>h</sup> -16    | ---NA---                                                 | 1               | 336                    | NA            |                  |               |                  | 82847-83182                | SH72J22          | AC238620         | 1         |
| CpY <sup>h</sup> -17    | ---NA---                                                 | 2               | 348                    | 173           |                  |               |                  | 31224-31744                | SH71E16          | AC239163         | 1         |
| CpY <sup>h</sup> -18**  | ---NA---                                                 | 2               | 936                    | 37            | 211              | 6             | 100%             | 29807-30779                | SH71E16          | AC239163         | 1         |



| Gene Symbol            | Putative Function                  | Number of Exons | Coding Sequence Length | Intron length | Autosome Homolog |               |                  | BAC                     |         |                  | Inversion |
|------------------------|------------------------------------|-----------------|------------------------|---------------|------------------|---------------|------------------|-------------------------|---------|------------------|-----------|
|                        |                                    |                 |                        |               | Super-contig #   | Linkage Group | Percent Identity | Position                | ID      | Accession Number |           |
|                        |                                    |                 |                        |               |                  |               |                  |                         |         |                  |           |
| CpY <sup>h</sup> -19†  | MADS_box protein                   | 7               | 554                    | 5369          | 55               | 2             | 93%              | 25944-26916             | SH71E16 | AC239163         | 1         |
| CpY <sup>h</sup> -20   | ---NA---                           | 2               | 396                    | 216           |                  |               |                  | 7864-13719, 22092-22158 | SH71E16 | AC239163         | 1         |
| PXCpXY <sup>h</sup> 21 | ---NA---                           | 1               | 363                    | NA            | 35               | 10 & 8        | 90%              | 10200-10811             | SH64O06 | AC239158         | 2         |
| PXCpXY <sup>h</sup> 22 | ---NA---                           | 1               | 432                    | NA            |                  |               |                  | 59558-59920             | SH23L24 | AC238593         | Collinear |
| PCpY <sup>h</sup> -1   | zinc finger-homeodomain protein    | 2               | 701                    | 34            | 55               | 2             | 92%              | 75917-76651             | SH85B16 | AC238630         | N/A       |
| PCpY <sup>h</sup> -2   | ---NA---                           | 1               | 1062                   | NA            |                  |               |                  | 139702-140763           | SH81O12 | AC239165         | 1         |
| PCpY <sup>h</sup> -3   | ---NA---                           | 1               | 2366                   | NA            |                  |               |                  | 71306-73658             | SH32G10 | AC238596         | 1         |
| PCpY <sup>h</sup> -4   | photosystem II protein D1          | 2               | 490                    | 28            | 3                | 10 & 8        | 95%              | 13836-14353             | SH32G10 | AC238596         | 1         |
| PCpY <sup>h</sup> -5   | ---NA---                           | 1               | 234                    | NA            |                  |               |                  | 114992-115225           | SH65D15 | AC238767         | 1         |
| PCpY <sup>h</sup> -6◇  | ---NA---                           | 1               | 237                    | NA            |                  |               |                  | 86266-86502             | SH65D15 | AC238767         | 1         |
| PCpY <sup>h</sup> -7   | ---NA---                           | 1               | 447                    | NA            |                  |               |                  | 84427-84873             | SH65D15 | AC238767         | 1         |
| PCpY <sup>h</sup> -8   | ---NA---                           | 2               | 375                    | 29917         |                  |               |                  | 157607-157839           | SH50M09 | AC238602         | 1         |
| PCpY <sup>h</sup> -9   | ---NA---                           | 1               | 320                    | NA            |                  |               |                  | 86998-87317             | SH72J22 | AC238620         | 1         |
| PCpY <sup>h</sup> -10  | ATP synthase CFO subunit 1 protein | 2               | 434                    | 524           | 30               | 11 & 9        | 95%              | 63737-64694             | SH20J12 | AC239142         | 1         |

Pseudogenes are denoted by a "P" and both HSY-specific genes and pseudogenes are numbered in consecutive order as they appear on the HSY physical map.

\*\*Gene is duplicated

† Gene spans 2 unordered BAC contigs, which is reflected in the BAC position, and the actual coding and intron length are larger than what is listed in the table.

‡Gene spans 2 BACs

◇Gene is fragmented on the X due to gaps in the X BAC sequence. Whether this gene is truly a pseudogene on the X is unknown.

NA- Not Available

**Table S11. List of papaya X-specific genes and pseudogenes in the papaya X sequence**

| Gene Symbol                         | Putative function                            | # of Exons | Coding Sequence Length | Intron length | Autosome Homolog |                |            | BAC position  | BAC ID  | Accession Number | Inversion |
|-------------------------------------|----------------------------------------------|------------|------------------------|---------------|------------------|----------------|------------|---------------|---------|------------------|-----------|
|                                     |                                              |            |                        |               | Linkage Group #  | Super-contig # | % identity |               |         |                  |           |
| CpX-1                               | ---NA---                                     | 1          | 355                    | NA            |                  |                |            | 124509-124863 | SH61H02 | EF661023         | 1         |
| PY <sup>h</sup> CpXY <sup>h2</sup>  | ---NA---                                     | 1          | 369                    | NA            |                  |                |            | 11583-11951   | SH61H02 | EF661023         | 1         |
| PY <sup>h</sup> CpXY <sup>h3</sup>  | ---NA---                                     | 1          | 600                    | NA            |                  |                |            | 4966-5565     | SH61H02 | EF661023         | 1         |
| CpX-4                               | Late embryogenesis abundant protein 18(IEA6) | 1          | 294                    | NA            |                  |                |            | 30640-30933   | SH31E12 | AC238595         | 1         |
| PY <sup>h</sup> CpXY <sup>h5</sup>  | ---NA---                                     | 1          | 261                    | NA            |                  |                |            | 26912-27172   | SH31E12 | AC238595         | 1         |
| CpX-6                               | ---NA---                                     | 2          | 351                    | 71            |                  |                |            | 9356-9777     | SH31E12 | AC238595         | 1         |
| PY <sup>h</sup> CpXY <sup>h7</sup>  | ---NA---                                     | 7          | 813                    | 2034          |                  |                |            | 87299-90145   | SH14F24 | FJ429365         | 1         |
| CpX-8                               | ---NA---                                     | 4          | 1104                   | 3143          |                  |                |            | 606-4852      | SH79M13 | AC239204         | 1         |
| CpX-9                               | ---NA---                                     | 3          | 468                    | 140           |                  |                |            | 33662-34269   | SH79M13 | AC239204         | 1         |
| CpX-10                              | ---NA---                                     | 2          | 432                    | 532           |                  |                |            | 51828-52791   | SH79M13 | AC239204         | 1         |
| CpX-11                              | ---NA---                                     | 1          | 207                    | NA            |                  |                |            | 58107-58313   | SH79M13 | AC239204         | 1         |
| CpX-12                              | ---NA---                                     | 1          | 183                    | 73            |                  |                |            | 140453-140708 | SH79M13 | AC239204         | 1         |
| CpX-13                              | Beta-hexosaminidase                          | 4          | 375                    | 1564          |                  |                |            | 145210-147148 | SH79M13 | AC239204         | 1         |
| CpX-14                              | Beta-hexosaminidase                          | 2          | 273                    | 67            |                  |                |            | 70136-70475   | SH83B06 | AC238628         | 1         |
| CpX-15                              | ---NA---                                     | 1          | 775                    | NA            |                  |                |            | 76137-76911   | SH83B06 | AC238628         | 1         |
| CpX-16                              | ---NA---                                     | 1          | 246                    | NA            |                  |                |            | 125817-126062 | SH83B06 | AC238628         | 1         |
| CpX-17                              | ---NA---                                     | 1          | 186                    | NA            |                  |                |            | 75754-75939   | SH54A04 | AC239201         | 1         |
| CpX-18                              | ---NA---                                     | 1          | 249                    | NA            |                  |                |            | 109919-110167 | SH54A04 | AC239201         | 1         |
| CpX-19                              | Defensin protein                             | 1          | 178                    | NA            |                  |                |            | 140283-140460 | SH54A04 | AC239201         | 1         |
| CpX-20                              | ---NA---                                     | 1          | 249                    | NA            |                  |                |            | 133351-133599 | SH55B21 | FJ429367         | 1         |
| CpX-21                              | ---NA---                                     | 1          | 474                    | NA            |                  |                |            | 157918-158391 | SH55B21 | FJ429367         | 1         |
| PY <sup>h</sup> CpXY <sup>h22</sup> | Vps51/Vps67 family protein                   | 6          | 3240                   | 16497         |                  |                |            | 178754-180952 | SH51A03 | AC238603         | 1         |
| PY <sup>h</sup> CpXY <sup>h23</sup> | Hypothetical protein                         | 1          | 339                    | NA            |                  |                |            | 86822-87160   | SH69D24 | AC239162         | 1         |

| Gene Symbol                          | Putative function                                                 | # of Exons | Coding Sequence Length | Intron length | Autosome Homolog |                |            | BAC position  | BAC ID  | Accession Number | Inversion |
|--------------------------------------|-------------------------------------------------------------------|------------|------------------------|---------------|------------------|----------------|------------|---------------|---------|------------------|-----------|
|                                      |                                                                   |            |                        |               | Linkage Group #  | Super-contig # | % identity |               |         |                  |           |
| CpX-24                               | ---NA---                                                          | 1          | 206                    | NA            |                  |                |            | 3337-3542     | SF08K16 | AC239251         | 1         |
| CpX-25                               | ---NA---                                                          | 1          | 195                    | NA            |                  |                |            | 48016-48210   | SH54M13 | AC238609         | 1         |
| CpX-26                               | ---NA---                                                          | 1          | 387                    | NA            |                  |                |            | 74095-74481   | SH38K02 | AC239149         | 1         |
| PY <sup>h</sup> CpXY <sup>h</sup> 27 | ---NA---                                                          | 2          | 252                    | 36            |                  |                |            | 142159-142446 | SH23D07 | AC238592         | 2         |
| PY <sup>h</sup> CpXY <sup>h</sup> 28 | DegP protease precursor                                           | 7          | 1029                   | 6420          |                  |                |            | 100325-107773 | SH84J07 | AC238629         | 2         |
| CpX-29                               | ---NA---                                                          | 1          | 465                    | NA            |                  |                |            | 20405-20869   | SH40J04 | AC238598         | 2         |
| PY <sup>h</sup> CpXY <sup>h</sup> 30 | ---NA---                                                          | 1          | 684                    | NA            |                  |                |            | 83840-84523   | SH40J04 | AC238598         | 2         |
| PY <sup>h</sup> CpXY <sup>h</sup> 31 | Hypothetical protein                                              | 2          | 465                    | 157           | NA               | 3104           | 94         | 52581-53202   | SH53E18 | EF661026         | 2         |
| CpX-32                               | ---NA---                                                          | 1          | 170                    | NA            |                  |                |            | 125470-125639 | SH53E18 | EF661026         | 2         |
| CpX-33                               | ---NA---                                                          | 2          | 135                    | 45            |                  |                |            | 197429-197608 | SH53E18 | EF661026         | 2         |
| CpX-34                               | ---NA---                                                          | 1          | 315                    | NA            |                  |                |            | 242470-242784 | SH53E18 | EF661026         | 2         |
| PCpX-1                               | Aspartic proteinase family protein                                | 1          | 1185                   | NA            |                  |                |            | 119238-120423 | SH61H02 | EF661023         | 1         |
| PCpX-2                               | Angio-associated migratory cell protein/transducin family protein | 3          | 376                    | 465           |                  |                |            | 117541-118381 | SH61H02 | EF661023         | 1         |
| PCpX-3                               | ---NA---                                                          | 1          | 153                    | NA            |                  |                |            | 109764-109916 | SH54A04 | AC239201         | 1         |
| PCpX-4                               | ---NA---                                                          | 1          | 352                    | NA            |                  |                |            | 65772-66123   | SH51A03 | AC238603         | 1         |

Pseudogenes are denoted by a "P" and are numbered in consecutive order as they appear on the physical map. The X-specific genes are numbered as they appear on the X physical map. For a compiled list of the paired, HSY, and X genes, numbered in order, see Table S5.

NA- Not Available

**Table S12. Summary of the numbers of transcription units found on the HSY and the corresponding X chromosomal region, showing three breakdowns: (i) into sequences that encode potentially functional products versus pseudogenes, (ii) into genes with potential functions, based on sequences in other plants and the analyses described above, versus ones with unknown functions, and (iii) into the genes' locations. The data are summarized from Tables S10, S11 and S12, as detailed in the footnotes.**

|                                                                          | Locations of genes    |                       |             |    |                               |    |           |    |           |   |                  |   |
|--------------------------------------------------------------------------|-----------------------|-----------------------|-------------|----|-------------------------------|----|-----------|----|-----------|---|------------------|---|
|                                                                          | Total genes           |                       | Known genes |    | New genes (unknown functions) |    | Stratum 1 |    | Stratum 2 |   | Collinear region |   |
|                                                                          | HSY                   | X                     | HSY         | X  | HSY                           | X  | HSY       | X  | HSY       | X | HSY              | X |
| <b>Protein coding transcription units in HSY or in X</b>                 | <b>72</b>             | <b>84</b>             | 54          | 57 | 18                            | 27 | 20        | 26 | 1         | 8 | 1                | 0 |
| <b>HSY/X pairs of transcription units</b>                                | <b>50</b>             |                       | 49          |    | 1                             |    | 14        |    | 19        |   | 17               |   |
| Autosomal origins                                                        | 2                     |                       | 2           |    | 0                             |    | —         |    | —         |   | —                |   |
| <b>Intact genes on HSY or X with pseudogene in the homolog</b>           | 16                    |                       | 8           |    | 8                             |    | 4         | 6  | 1         | 4 | 1                | 0 |
| X pseudogene-HSY intact <sup>1</sup>                                     | —                     | <b>6</b>              | —           | 3  | —                             | 3  | 4         |    | 1         |   | 1                |   |
| HSY pseudogene-X intact <sup>2</sup>                                     | <b>10</b>             | —                     | 5           | —  | 5                             | —  |           | 6  |           | 4 |                  | 0 |
| <b>HSY- or X-specific transcription units</b>                            | <b>16<sup>3</sup></b> | <b>24<sup>4</sup></b> | 2           | 4  | 14                            | 20 | 16        | 20 | 0         | 4 | 0                | 0 |
| Autosomal origins                                                        | 7                     | 0                     | 2           | 0  | 5                             | 0  | —         | —  | —         | — | —                | — |
| Unknown origins                                                          | 9                     | 24                    | 0           | 4  | 9                             | 20 | —         | —  | —         | — | —                | — |
| <b>Pseudogenes with no functional counterpart in either the X or HSY</b> | <b>14</b>             | <b>8</b>              | 5           | 4  | 9                             | 4  | 1         |    | 2         |   | 1                |   |
| <b>Pseudogene pairs (in both HSY and X)</b>                              | <b>4</b>              |                       | 2           |    | 2                             |    | 1         |    | 2         |   | 1                |   |
| <b>Pseudogenes specific to HSY or X</b>                                  | <b>10<sup>5</sup></b> | <b>4<sup>6</sup></b>  | 3           | 2  | 7                             | 2  | 10        | 4  | 0         | 0 | 0                | 0 |
| Autosomal origins                                                        | 3                     | 0                     | 3           | 0  | 0                             | 0  | —         | —  | —         | — | —                | — |
| Unknown origins                                                          | 7                     | 4                     | 0           | 2  | 7                             | 2  | —         | —  | —         | — | —                | — |

<sup>1</sup>Denoted by PXCpXY<sup>h</sup> in Table S10

<sup>2</sup>PY<sup>h</sup>CpXY<sup>h</sup> in Table S11

<sup>3</sup>CpY<sup>h</sup> in Table S10

<sup>4</sup>CpX in Table S11

<sup>5</sup>PCpY<sup>h</sup> in Table S10

<sup>6</sup>PCpX in Table S11

**Table S13. Gene densities and repetitive element contents of the inversions and the collinear region of the HSY and the homologous region of the X chromosome.**

| Location                              | Sequence length (kb) | Number of genes |              | Gene density (kb/1 gene) | Repetitive elements |
|---------------------------------------|----------------------|-----------------|--------------|--------------------------|---------------------|
| <b>HSY</b>                            |                      |                 |              |                          |                     |
| Inversion 1                           | 3680                 | HSY-specific    | 20           | 175                      | <b>80.7%</b>        |
|                                       |                      | Pair            | 14           | 307                      |                     |
|                                       |                      | <b>Total</b>    | <b>33</b>    | <b>112</b>               |                     |
| Inversion 2                           | 3097                 | HSY-specific    | 1            | 1548                     | <b>80.2%</b>        |
|                                       |                      | Pair            | 19           | 163                      |                     |
|                                       |                      | <b>Total</b>    | <b>21</b>    | <b>147</b>               |                     |
| Collinear region                      | 545                  | HSY-specific    | 1            | 272                      | <b>48.2%</b>        |
|                                       |                      | Pair            | 17           | 34                       |                     |
|                                       |                      | <b>Total</b>    | <b>18</b>    | <b>30</b>                |                     |
| <b>X chromosome homologous region</b> |                      |                 |              |                          |                     |
| Inversion 1                           | 1915                 | X-specific      | 26           | 74                       | <b>76.8%</b>        |
|                                       |                      | Pair            | 14           | 147                      |                     |
|                                       |                      | <b>Total</b>    | <b>39</b>    | <b>49</b>                |                     |
| Inversion 2                           | 912                  | X-specific      | 8            | 114                      | <b>60.5%</b>        |
|                                       |                      | Pair            | 19           | 51                       |                     |
|                                       |                      | <b>Total</b>    | <b>26</b>    | <b>35</b>                |                     |
| Collinear region                      | 454                  | X-specific      | 0            | -                        | <b>45.5%</b>        |
|                                       |                      | Pair            | 17           | 28                       |                     |
|                                       |                      | <b>Total</b>    | <b>16</b>    | <b>28</b>                |                     |
| <b>Genome wide average</b>            | <b>372000</b>        | <b>Total</b>    | <b>22934</b> | <b>16</b>                | <b>51.9%</b>        |

Pseudogenes are excluded from the gene totals in this table. The genome wide data are from Ming et al.,2008 (12).

**Table S14. GenBank accession numbers of the papaya HSY and X BACs.**

| BAC ID   | GenBank Accession No. | Insert size (Kb) | Chromosome |
|----------|-----------------------|------------------|------------|
| SH01I11  | AM778099              | 107              | HSY        |
| SH05K22  | AC239135              | 96               | HSY        |
| SH07G04  | AC238760              | 106              | HSY        |
| SH11D16  | AC238589              | 106              | HSY        |
| SH12D03  | AC239139              | 98               | HSY        |
| SH14F22  | AC239140              | 93               | HSY        |
| SH17J04  | AC238761              | 95               | HSY        |
| SH20J12  | AC239142              | 109              | HSY        |
| SH23L24  | AC238593              | 102              | HSY        |
| SH27G03  | AC239146              | 80               | HSY        |
| SH30L14  | AC238594              | 94               | HSY        |
| SH32G10  | AC238596              | 89               | HSY        |
| SH36M01  | AC239148              | 69               | HSY        |
| SH41F24  | EF625817              | 119              | HSY        |
| SH47B08  | AC238600              | 97               | HSY        |
| SH49L11  | AC238601              | 173              | HSY        |
| SH50M09  | AC238602              | 196              | HSY        |
| SH52H15  | AC238762              | 242              | HSY        |
| SH52N19  | AC238763              | 63               | HSY        |
| SH53E10  | AC238764              | 198              | HSY        |
| SH53G04  | AC238607              | 166              | HSY        |
| SH53O12  | AC238608              | 129              | HSY        |
| SH54H01  | EF625819              | 189              | HSY        |
| SH57B23  | AC238765              | 145              | HSY        |
| AM57M14  | AC239203              | 108              | HSY        |
| SH58C24  | AC239153              | 148              | HSY        |
| SH59G12  | AC238611              | 102              | HSY        |
| SH59O17  | AC239154              | 163              | HSY        |
| SH60M19  | JN088492              | 255              | HSY        |
| SH61F18  | AC238766              | 202              | HSY        |
| SH61K24  | AC239155              | 138              | HSY        |
| SH62E'02 | AC239156              | 185              | HSY        |
| SH62H24  | AC239157              | 176              | HSY        |
| SH64O06  | AC239158              | 139              | HSY        |
| SH65D15  | AC238767              | 124              | HSY        |
| SH66N15  | AC238768              | 224              | HSY        |
| SH67H04  | AC238615              | 178              | HSY        |
| SH68C12  | AC238616              | 146              | HSY        |
| SH69A08  | AC238769              | 179              | HSY        |
| SH69C01  | AC238618              | 42               | HSY        |
| SH69E13  | AC238619              | 217              | HSY        |
| SH71E16  | AC239163              | 163              | HSY        |
| SH72J22  | AC238620              | 173              | HSY        |
| SH72L16  | AC238621              | 183              | HSY        |
| SH74D06  | AC238770              | 154              | HSY        |
| SH75H06  | AC238771              | 222              | HSY        |
| SH76M08  | EF625820              | 133              | HSY        |
| SH78H09  | AC238624              | 223              | HSY        |
| SH79C23  | AC238625              | 105              | HSY        |

|          |          |     |     |
|----------|----------|-----|-----|
| SH80L24  | AC239164 | 195 | HSY |
| SH81O12  | AC239165 | 186 | HSY |
| SH82H21  | AC238627 | 188 | HSY |
| SH85B16  | AC238630 | 150 | HSY |
| SH85B24  | EF661024 | 294 | HSY |
| SH88A07  | AC239168 | 156 | HSY |
| SH89I15  | AC238633 | 180 | HSY |
| SH89M06  | AM778096 | 192 | HSY |
| SH90D06  | AC238772 | 221 | HSY |
| SH92K23  | AC238635 | 184 | HSY |
| SH92L01  | AC239169 | 163 | HSY |
| SH93H03  | AC238636 | 177 | HSY |
| SH94E22  | EF625821 | 184 | HSY |
| SH95B12  | EF661025 | 146 | HSY |
| SH96A24  | AC239171 | 189 | HSY |
| SH99O03  | FJ429372 | 128 | HSY |
| SH102N12 | FJ429373 | 84  | HSY |
| AM125I09 | AC239252 | 80  | HSY |
| AM126G07 | AC239198 | 98  | HSY |
| SH06M23  | AC239136 | 68  | X   |
| SF08K16  | AC239251 | 70  | X   |
| SH10J17  | AC239138 | 106 | X   |
| SH12G20  | GU799580 | 95  | X   |
| SH12I03  | AC238590 | 76  | X   |
| SH14F24  | FJ429365 | 104 | X   |
| SH22E'07 | AC239143 | 76  | X   |
| SH23D07  | AC238592 | 141 | X   |
| SH23D15  | AC239144 | 20  | X   |
| SH24L08  | AC239145 | 76  | X   |
| SH30B21  | AC239147 | 101 | X   |
| SH31E12  | AC238595 | 91  | X   |
| SH38K02  | AC239149 | 97  | X   |
| SH39A12  | AC238597 | 49  | X   |
| SH40J04  | AC238598 | 103 | X   |
| SH42B05  | EF625818 | 91  | X   |
| SH46O19  | AC238599 | 103 | X   |
| SH49A07  | AC239150 | 203 | X   |
| SH50J21  | AC239200 | 343 | X   |
| SH50M24  | JN088493 | 148 | X   |
| SH51A03  | AC238603 | 184 | X   |
| SH53E18  | EF661026 | 252 | X   |
| SH54A04  | AC239201 | 200 | X   |
| SH54A09  | AC239152 | 158 | X   |
| SH54M13  | AC238609 | 216 | X   |
| SH54M22  | AC239202 | 168 | X   |
| SH55B21  | FJ429367 | 198 | X   |
| SH55E02  | FJ429368 | 159 | X   |
| SH61H02  | EF661023 | 168 | X   |
| SH65C15  | AC239160 | 153 | X   |
| SH69D05  | AC239161 | 190 | X   |
| SH69D24  | AC239162 | 144 | X   |
| SH79M13  | AC239204 | 153 | X   |

|          |          |     |   |
|----------|----------|-----|---|
| SH80F18  | AC238626 | 183 | X |
| SH83B06  | AC238628 | 141 | X |
| SH84J07  | AC238629 | 222 | X |
| SH84M10  | AC239166 | 259 | X |
| SH85C03  | AC238631 | 190 | X |
| SH86B15  | AC239167 | 182 | X |
| SH87C01  | NA       | 239 | X |
| SH87M18  | AC238632 | 81  | X |
| SH93K15  | AC239170 | 186 | X |
| SH95I24  | GU799579 | 218 | X |
| SH99B01  | AC238637 | 157 | X |
| AM136D11 | AC239253 | 89  | X |

**Table S15. GC content and CpG island in the HSY, the corresponding X sequence, and the complete papaya genome sequence.**

|                                         | HSY (8.1 Mb) |          | X (3.5 Mb) |         | X Knob 1 (1.9 Mb) |          | Genome    |           |
|-----------------------------------------|--------------|----------|------------|---------|-------------------|----------|-----------|-----------|
|                                         | Total        | Masked   | Total      | Masked  | Total             | Masked   | Total     | Masked    |
| Sequence length                         | 8070272      | 1675370  | 3458800    | 1086276 | 1921421           | 765855   | 273570756 | 133701001 |
| Bases occupied by CpG islands           | 253397       | 27967    | 124448     | 16125   | 97812             | 19353    | 10984317  | 2315247   |
| %GC                                     | 36.19        | 35.71    | 35.73      | 34.17   | 35.99             | 34.6     | 35.32     | 33.45     |
| No. of CpG islands                      | 838          | 91       | 400        | 50      | 307               | 58       | 34680     | 6923      |
| No. of CpG islands/Mb of total sequence | 103.84       | 11.3     | 115.65     | 14.5    | 159.78            | 30.2     | 126.77    | 25.3      |
| CpG island size range (bp)              | 200-1433     | 200-1433 | 200-959    | 200-771 | 200-1316          | 201-1316 | 200-3037  | 200-1702  |
